1 **High salinity activates CEF and attenuates state transitions in both psychrophilic and**  
2 **mesophilic *Chlamydomonas* species**

3

4 Isha Kalra\* <sup>a, c</sup>, Xin Wang<sup>a</sup>, Ru Zhang<sup>b</sup>, Rachael Morgan-Kiss<sup>a</sup>

5 Contact information:

6 <sup>a</sup> Department of Microbiology, Miami University, Oxford, Ohio 45056

7 <sup>b</sup> Donald Danforth Plant Science Center, St. Louis, Missouri 63132

8 <sup>c</sup> Present address: Department of Biology, University of Southern California, Los Angeles, CA  
9 90089

10 \*Correspondence:

11 Isha Kalra

12 Department of Biology

13 University of Southern California

14 3616 Trousdale Avenue, AHF 301

15 Los Angeles, CA 90089

16 [ishakalr@usc.edu](mailto:ishakalr@usc.edu)

17 (513)593-5114

18

19 **Running head:** Interactions between salinity, CEF and state transitions

20 **ABSTRACT**

21 In the last decade, studies have revealed the importance of PSI-driven cyclic electron flow (CEF)  
22 in stress acclimation in model organisms like *C. reinhardtii*; however, these studies focused on  
23 transient, short-term stress. In addition, PSI-supercomplexes are associated with CEF during  
24 state transition response to short-term stress. On the other hand, the role of CEF during long-term  
25 stress acclimation is still largely unknown. In this study, we elucidate the involvement of CEF in  
26 acclimation response to long-term high salinity in three different *Chlamydomonas* species  
27 displaying varying salinity tolerance. We compared CEF rates, capacity for state transitions, and  
28 formation of supercomplexes after salinity acclimation in the model mesophile *C. reinhardtii* and  
29 two psychrophilic green algae *C. priscuii* (UWO241) and *C. sp.* ICE-MDV. CEF was activated  
30 under high salt in all three species, with the psychrophilic *Chlamydomonas* spp. exhibiting the  
31 highest CEF rates. High salt acclimation was also correlated with reduced state transition  
32 capacity and a PSI-supercomplex was associated with high CEF. We propose that under long-  
33 term stress, CEF is constitutively activated through assembly of a stable PSI-supercomplex. The  
34 proteomic composition of the long-term PSI-supercomplex is distinct from the supercomplex  
35 formed during state transitions, and its presence attenuates the state transition response.

36

37 **Keywords:** Cyclic electron flow, PSI-supercomplex, state transitions, *Chlamydomonas*,  
38 acclimation, long-term stress, non-model organism, salinity stress, photosynthesis

39

40 **Abbreviations:**

41 CEF: cyclic electron flow

42 PETC: photosynthetic electron transport chain

43 PSI: photosystem I

44 PSII: photosystem II

45 LHCI: light harvesting complex I

46 LHCII: light harvesting complex 2

47 Cyt b<sub>6</sub>f: cytochrome b<sub>6</sub>f

48 NPQ: non-photochemical quenching

49 FNR: ferredoxin NADP reductase

50 ANR1: anaerobic response I protein

51 CAS: calcium sensing protein

52 PGRL1: proton gradient like protein 1

53 ECS: electrochromic shift

54 DIRK: dark interval relaxation kinetics

55

## 56 INTRODUCTION

57 Salinity is a challenging abiotic stress encountered by plants and algae. With intensified  
58 agricultural practices, increased soil salinization has caused significant losses in crops and global  
59 productivity (Morton et al., 2019; Welle and Mauter, 2017). Excess salinity causes ion toxicity  
60 and disturbs osmotic balance (Hasegawa et al., 2000; Kumar et al., 2018). Additionally, under  
61 high salt conditions, photosynthetic organisms can experience loss of membrane organization,  
62 inhibition of photosynthesis, increased reactive oxygen species, and disruptions in nutrient  
63 acquisition. Responses to high salinity include: (i) changes in cell wall turgor or volume, (ii)  
64 selective uptake of ions by organelles such as vacuoles, and (iii) active exclusion of sodium ions  
65 and/or accumulation of compatible osmolytes such as glycerol in the cell to maintain ion  
66 homeostasis (Goyal, 2007; He et al., 2015, Figler et al. 2019).

67 Exposure to any abiotic stress leads to disruptions in cell homeostasis, including over-  
68 reduction of the photosynthetic electron transport chain (PETC). This over-reduction of PETC  
69 can lead to production of ROS or photoinhibition, and organisms must balance this redox  
70 imbalance to maintain growth and photosynthesis (Hüner et al., 2012). In their natural  
71 environments, organisms encounter a myriad of environmental stresses (e.g. high light, low  
72 temperatures, high salinity, nutrient deficiency), which may last for a few minutes (short-term or  
73 transient) or persist for days to years (long-term) (Kono & Terashima, 2014). Photosynthetic  
74 organisms respond to these environmental perturbations either through short-term acclimatory  
75 responses such as state-transitions or long-term reorganization of the photosynthetic apparatus or  
76 shifts in downstream carbon metabolism. PSI-driven cyclic electron flow (CEF), is essential for  
77 balancing energy needs for carbon fixation and in survival under stress by supplying additional  
78 ATP and/or activating photoprotection, thus also balancing the redox status (Kramer & Evans,  
79 2011; Suorsa, 2015). Although our knowledge CEF has grown rapidly in the past decade, the  
80 current understanding of the role of CEF in stress acclimation has been mainly restricted to  
81 treatments over short time scales. There is an underappreciation for CEF mechanism and  
82 function during long-term stress acclimation or adaptation to permanently stressful environments  
83 (DalCorso et al., 2008; Iwai et al., 2010; Lucker & Kramer, 2013; Takahashi et al., 2013;  
84 Takahashi et al., 2016).

85 While the exact mechanism of CEF initiation is still debated, formation of thylakoid  
86 protein supercomplexes appear to play an important role in the activation of CEF (Minagawa,

87 2016). In the last decade, the contribution of PSI-supercomplexes in initiating CEF has been  
88 extensively studied in model organisms such as *C. reinhardtii* (Alric, 2010; Iwai et al., 2010;  
89 Minagawa, 2016; Steinbeck et al., 2018; Terashima et al., 2012). State transition conditions (ie.  
90 short-term exposure to a condition causing over-reduction of the PETC) have been implicated in  
91 assembly of the supercomplex and activation of transiently high CEF (Iwai et al., 2010;  
92 Minagawa, 2016). The supercomplex of *C. reinhardtii* cells in State 2 was shown to be  
93 composed of PSI-LHCI, LHCII, cytochrome  $b_6f$  (cyt  $b_6f$ ), FNR (ferredoxin NADP reductase),  
94 PGRL1 (proton gradient like protein 1), CAS (calcium sensing protein) and other minor proteins  
95 (Z. Huang et al., 2021; Steinbeck et al., 2018; Takahashi et al., 2016; Terashima et al., 2012).

96 Many processes involved in salinity response require additional ATP; therefore,  
97 organisms exposed to high salt (both halophyte and non-halophyte) deal with continuous  
98 pressure to deal with high energy demands. In addition to playing a key role in photoprotection,  
99 CEF can also provide extra ATP. CEF constitutes a major pathway by which photosynthetic  
100 organisms fine tune the ATP/NADPH ratio based on downstream energetic demands (Suorsa,  
101 2015). A significant body of research has been focused on salinity stress response in non-  
102 halophyte models, such as *C. reinhardtii*. (Neelam & Subramanyam, 2013; Sudhir & Murthy,  
103 2004; Wang et al., 2018; Perrineau et al., 2014; Sithtisarn et al., 2017). Much of the work on  
104 salinity stress in *C. reinhardtii* was conducted under mixotrophic growth conditions, which  
105 confounds understanding how the PETC responds to salinity due to bypassing of photosynthetic  
106 growth in presence of acetate (Heifetz et al., 2000). In addition, halophilic and halotolerant algae  
107 (eg: *Dunaliella salina*) and plants (eg: *Atriplex*, *Mesembryanthemum crystallinum*) can provide  
108 additional insights regarding the full potential of photosynthetic organisms to maintain rapid  
109 growth at high salinities (Greenway & Munns, 1980). *D. salina*, a dominant primary producer in  
110 hypersaline environments (Oren, 2014), is one of the few photosynthetic algal models for high  
111 salinity adaptation (Cowan et al., 1992). Direct comparisons between the reference alga *C.*  
112 *reinhardtii* and stress-tolerance organisms such as the halophyte *D. salina* are problematic due to  
113 their distant relatedness. There is a growing appreciation for efforts to expand studies to focus on  
114 a repertoire of ‘wild’ *Chlamydomonas* spp. exhibiting broad tolerances to environmental  
115 disturbances , including low temperatures, extremes in pH, nutrient-poor habitats, and  
116 desiccation (Grossman, 2021).

117 Non-model organisms that are adapted to very long-term stress lasting 100s-1000s of  
118 years represent under-exploited reservoirs of novel adaptive mechanisms (Dolhi et al., 2013).  
119 One such organism is the Antarctic psychrophile *Chlamydomonas priscuii* UWO241 (UWO241  
120 henceforth), which was isolated from deep photic zone of the ice-covered lake Bonney in the  
121 McMurdo Dry Valleys (Morgan et al., 1998; Stahl-Rommel et al., 2021). Extensive studies on  
122 this organism have demonstrated that it is a psychrophilic, halotolerant green alga with a  
123 reorganized photosynthetic apparatus that includes PSII with a large light harvesting antenna,  
124 matched by PSI complexes with diminished antenna size (Dolhi et al., 2013; Morgan-Kiss et al.,  
125 2002b; Morgan et al., 1998; Szyszka et al., 2007). Some short-term acclimation strategies,  
126 including state transitions, appear to have been lost during adaptation to permanent and stable  
127 extreme stress (Morgan-Kiss et al., 2002a). As a consequence of adaptation to a native  
128 environment of hypersalinity and permanent cold, UWO241 exhibits sustained high rates of  
129 CEF, which is associated with assembly of a stable PSI-supercomplex (Morgan-Kiss et al., 2002;  
130 Morgan et al., 1998; Szyszka et al., 2007). Szyszka *et. al* (2015) detected proteins of PSI, cyt b<sub>6</sub>f,  
131 as well as two novel phosphor-proteins, FtsH and a PsbP-like protein in the UWO241  
132 supercomplex (Szyszka-Mroz et al., 2015). Later, Kalra et al. (2020) improved the yield of the  
133 UWO241 PSI-supercomplex and reported the presence of several additional polypeptides,  
134 including several PSI subunits, chloroplastic ATP synthase, CAS and PGRL1. The constitutively  
135 high CEF appears to provide multiple advantages to UWO241, including extra ATP and a strong  
136 capacity for NPQ (Kalra et al., 2020).

137 More recently, a second photopsychrophile, named *Chlamydomonas* sp. ICE-MDV (ICE-  
138 MDV henceforth) was isolated from the Antarctic lake Bonney. Unlike UWO241, ICE-MDV  
139 resides in the shallow photic zone of the water column where it receives high light, but reduced  
140 salinity and very low nutrients (Li & Morgan-Kiss, 2019; Li et al., 2016). ICE-MDV is also  
141 psychrophilic; however, it exhibits some distinct physiological differences from UWO241 in its  
142 photosynthetic apparatus. For example, unlike UWO241, whole cells of ICE-MDV exhibit  
143 detectable levels of PSI low temperature fluorescence (Cook et al., 2019).

144 Previous studies have shown that adaptation to high salinity in the psychrophile UWO241  
145 is manifested as formation of a novel PSI-supercomplex to support sustained high rates of CEF.  
146 We thus hypothesize that CEF and supercomplexes are important in long-term salinity stress  
147 acclimation. Here we investigated whether increased CEF may constitute a common strategy to

148 fine tune redox status of PETC and provide extra ATP under long-term salinity stress in  
149 mesophilic and other psychrophilic *Chlamydomonas* species. We then hypothesized that  
150 acclimation to long-term salinity stress inhibits the capacity for state transitions through  
151 constitutive upregulation of PSI-supercomplex associated CEF. To test these hypotheses, we  
152 compared CEF rates, state transition ability, and looked for the presence of supercomplexes after  
153 long-term salinity acclimation in the salt sensitive reference strain *C. reinhardtii* as well as the  
154 two Antarctic algae adapted to moderate (ICE-MDV) and very high (UWO241) salinity in their  
155 native habitat.

156

## 157 **METHODS**

### 158 ***Culture conditions, growth physiology.***

159 Three different *Chlamydomonas* species were used in this study: *C. priscuui* (UWO241; strain  
160 CCMP1619), *C. sp.* ICE-MDV (ICE-MDV) and the model *C. reinhardtii* (strain UTEX 90). All  
161 three species were first grown in Bold's Basal Media (BBM, 0.43 mM NaCl) (Low salt, LS).  
162 Based on previous studies, UWO241 and ICE-MDV cultures were grown under a  
163 temperature/irradiance regime of 8°C/50  $\mu\text{mol photons m}^{-2} \text{s}^{-1}$  (Cook et al., 2019; Morgan et al.,  
164 1998). *C. reinhardtii* UTEX 90 was grown in BBM (LS) at 20°C/100  $\mu\text{mol photons m}^{-2} \text{s}^{-1}$ . All  
165 cultures were grown in 250 ml glass pyrex tubes in temperature regulated aquaria under a 24 h  
166 light cycle and were continuously aerated with sterile air supplied by aquarium pumps (Morgan-  
167 Kiss et al., 2002).

168 For the salinity tolerance study, cultures were grown in increasing concentration of NaCl  
169 supplemented BBM (0.43-700 mM NaCl for UWO241 and ICE-MDV, 0-200 mM NaCl for *C.*  
170 *reinhardtii*). Growth was monitored by optical density at wavelength of 750 nm. Maximum  
171 growth rates were calculated using natural log transformation of the optical density values during  
172 the exponential phase. Three biological replicates were performed.

173 For salinity stress acclimation, cultures were grown in maximum tolerated salinity levels  
174 and sub-cultured after reaching log-phase, at least 2-3 times. All subsequent experiments were  
175 conducted on low salinity (LS) and high salinity acclimated (HS) log-phase cultures.

176

### 177 ***Room-temperature PSII chlorophyll fluorescence measurements***



178 Photosynthetic measurements were conducted using room temperature PSII chlorophyll  
179 fluorescence through Dual PAM-100 instrument (Walz, Germany). Briefly, 2 ml of  
180 exponentially grown cultures were dark adapted using far-red light for 2 min prior to the  
181 measurement. For steady-state analysis, we used induction curves to measure maximum capacity  
182 of photosynthesis ( $F_v/F_m$ ), photosynthetic yield (YPSII), non-photochemical quenching (YNPQ)  
183 and photochemical yield (qP) with actinic light set at growth light intensities for each species.  
184 Light curves in Dual-PAM were also conducted to measure the change in capacity of NPQ with  
185 increasing light levels.

186

### 187 *State transition induction*

188 State transition experiments were conducted on both low and high salinity acclimated cultures.  
189 Briefly, cultures were harvested in the mid-log phase and induced in either state 1 or state 2  
190 through addition of chemical inhibitors as described before (Iwai et al., 2010). For state 1  
191 induction, mid-log phase cells were incubated in 10  $\mu\text{M}$  DCMU to completely oxidize the PQ  
192 pool prior to measurement. For state 2 induction, cells were incubated in 5  $\mu\text{M}$  FCCP for 20 min.  
193 State transition response was measured through either 77 K spectra or PSII fluorescence as  
194 described below.

195

### 196 *Low temperature (77K) fluorescence spectra*

197 Low temperature (77K) fluorescence spectra were conducted as previously described (Morgan et  
198 al. 1998). Briefly, log-phase cultures or isolated Chl-protein complexes were dark adapted for 10  
199 mins and flash frozen in liquid  $\text{N}_2$  before the measurement. Frozen samples were exposed to  
200 excitation wavelength of 436 nm with slit widths of 8 nm for whole cells and 5 nm for isolated  
201 complexes in a continuously cooled environment (Morgan-Kiss et al., 2008). For each sample,  
202 at-least three replicates of emission spectra were measured.

203

### 204 *PSII fluorescence state transition measurement*

205 Room temperature PSII fluorescence measurements were conducted on cultures induced in state  
206 1 or state 2 as described above. Preliminary analysis was done to identify PSII saturating actinic  
207 light intensity and 200  $\mu\text{mol photons m}^{-2} \text{s}^{-1}$  was chosen for the subsequent measurements. Log-  
208 phase exponentially growing cultures (2 mL) were used. Briefly, measuring light was switched

209 on in the dark and minimal PSII fluorescence ( $F_0$ ) was measured. Subsequently, cultures were  
210 exposed to 200  $\mu\text{mol photons m}^{-2} \text{s}^{-1}$  of actinic red light ( $\lambda_{\text{max}}=620 \text{ nm}$ ,  $10 \text{ Wm}^{-2}$ , Scott filter RG  
211 715) to measure maximum fluorescence ( $F_M$ ). Percent state transition capacity was calculated  
212 using  $F_M$  values measured under state 1 and state 2 using the formula  $(F_M^{\text{ST1}} - F_M^{\text{ST2}}) / F_M^{\text{ST1}}$  % as  
213 described before (Girolomoni et al., 2017), where  $F_M^{\text{ST1}}$  and  $F_M^{\text{ST2}}$  are the maximal PSII  
214 fluorescence under state 1 and 2 respectively.

215

### 216 *P700 oxidation-reduction kinetics*

217 Actinic red light induced photooxidation-reduction of P700 was used to determine rates of CEF  
218 as previously described (Alric et al., 2010; Morgan-Kiss et al., 2002). Exponential phase cultures  
219 ( $\sim 25 \mu\text{g Chl}$ ) were dark adapted for 10 min in presence of DCMU to block electrons from PSII.  
220 Dark adapted cultures were then filtered onto 25 mm GF/C filters (Whatman) and measured on  
221 the Dual-PAM 100 instrument using the leaf attachment. Absorbance changes at 820 nm were  
222 used to calculate proportion of photooxidizable P700, expressed as the parameter  $\Delta A_{820}/A_{820}$ . To  
223 start the measurement, the signal was balanced and measuring light was switched on. First, P700  
224 was oxidized ( $\text{P700}^+$ ) by switching on the actinic red light (AL,  $\lambda_{\text{max}}=620 \text{ nm}$ ,  $10 \text{ Wm}^{-2}$ , Scott  
225 filter RG 715). Subsequently, AL was switched off to re-reduce  $\text{P700}^+$  after steady-state  
226 oxidation was reached. The half time for the reduction of  $\text{P700}^+$  to P700 ( $t_{1/2}^{\text{red}}$ ) was calculated as  
227 an estimate of relative rates of PSI-driven CEF (Ivanov et al., 1998). The re-reduction time for  
228 P700 was calculated using GraphPad Prism<sup>TM</sup> software.

229

### 230 *In-vivo spectroscopy measurements*

231 Dark Interval Relaxation Kinetics (DIRK) of electrochromic shift (ECS) were performed on the  
232 Kramer Lab IDEA spectrophotometer (Sacksteder & Kramer, 2000; Zhang et al., 2009) to  
233 evaluate proton fluxes across thylakoid membrane. Simultaneously, saturation-pulse chlorophyll  
234 fluorescence was also measured to estimate the PSII operating efficiency ( $\phi\text{PSII}$ ). Measurements  
235 were performed as described before (Kalra et al, 2020). Briefly, 2.5 ml of exponential phase *C.*  
236 *reinhardtii* culture was incubated in presence of bicarbonate under dark condition for 10 min  
237 followed by far red exposure for 10 min, to fully oxidize the plastoquinone pool. Cells were  
238 incubated in increasing actinic red light for 5 min, and ECS and chlorophyll fluorescence were  
239 measured after each light incubation. The PSII operating efficiency was calculated using the

240 formula:  $(F_M' - F_S) / F_M$  and linear electron flow (LEF) was calculated using the equation  $A \times$   
241  $(fraction_{PSII}) \times I \times \phi_{PSII}$  (Baker, 2008), where  $A$  is absorptivity of the sample (assumed to be  
242 0.84),  $fraction_{PSII}$  is the fraction of light absorbed by PSII stimulating photosynthesis,  $I$  is the  
243 irradiance used and  $\phi_{PSII}$  is the operating efficiency of PSII as calculated above. In the above  
244 equation,  $fraction_{PSII}$  was calculated using the 77K fluorescence spectra and the fraction were  
245 0.56 and 0.579 for low and high salinity conditions, respectively. Proton motif force ( $pmf$ ) was  
246 estimated by using the total amplitude of ECS signal ( $ECS_t$ ), and the total proton conductivity  
247 ( $g_H^+$ ) of thylakoid membranes was estimated through the inverse of half time of rapid decay of  
248 ECS signal ( $\tau_{ECS}$ ) during the DIRK measurements (Baker et al, 2007).

249

### 250 ***Thylakoid isolation, SDS-PAGE and immunoblotting.***

251 Thylakoid membranes were isolated according to previously described protocol (Morgan-Kiss et  
252 al., 1998). Briefly, log-phase cells were harvested using centrifugation (2500g at 4°C for 5 min)  
253 and resuspended in the cold grinding buffer (0.3 M sorbitol, 10 mM NaCl, 5mM MgCl<sub>2</sub>, 1mM  
254 benzamidine and 1 mM amino-caproic acid). The resuspension was passed through a chilled  
255 French press at 10,000 lb/in<sup>2</sup> two times followed by centrifugation at 23,700g for 30 min to  
256 collect thylakoid membranes. The membranes were then washed to remove any impurities using  
257 wash buffer (50 mM Tricine-NaOH [pH 7.8], 10 mM NaCl, 5mM MgCl<sub>2</sub>) and the pure thylakoid  
258 membranes were collected (13,300 g at 4°C for 20 min). Membranes were resuspended in  
259 storage buffer and kept at -80°C until further use.

260 SDS-PAGE and immunoblotting was performed using 12% Urea-SDS gel (Laemmli,  
261 1970) and as previously described (Kalra et al., 2020). Phosphorylated threonine sites were  
262 probed using a primary antibody against P-Thr (Catalog # MA5-27976, Thermo Fisher) at 1:500  
263 dilution followed by exposure to protein A conjugated to horseradish peroxidase. Protein blots  
264 were detected using ECL Select™ Western Blotting Detection Reagent (Amersham).

265

### 266 ***Supercomplex isolation.***

267 Sucrose density gradient centrifugation was used to isolate supercomplexes from exponentially  
268 grown cultures as previously described (Szyszka-Mroz et al., 2015; Kalra et al, 2020). All steps  
269 were performed in darkness and on ice. All buffers contained phosphatase (20 mM NaF) and

270 protease (1 mM Pefabloc SC) inhibitors. Protein complexes were extracted using a 21-gauge  
271 needle for further analysis.

272

### 273 ***Sample preparation for proteomics.***

274 For identifying protein components in the supercomplex, the complex was harvested and 30 µg  
275 of total protein was processed for proteomics following the previously published method by  
276 Wang et al. (Wang et al., 2016). Samples were digested and cleaned as described before (Kalra et  
277 al., 2020).

278

### 279 ***Proteomic analyses by liquid chromatography-tandem mass spectrometry (LC-MS/MS).***

280 Two µg of digested peptides were directly loaded onto a capillary C18 column without  
281 fractionation and analyzed in a Thermo LTQ Orbitrap XL mass spectrometer. The full mass  
282 spectra in the range of 350-1800 m/z were recorded with a resolution of 30,000, and the top 12  
283 peaks of each scan were then selected for further fragmentation for MS/MS analysis. The  
284 MS/MS raw data was analyzed using the Patternlab for Proteomic tool (Carvalho et al., 2016).  
285 Our UWO241 transcriptomics data was used to generate a UWO241 protein database after  
286 supplementing with 37 common contaminants. Reversed sequences were also included as a  
287 quality control system to restrain false positive discovery rate to 0.05. *C. reinhardtii* protein  
288 database was downloaded from NCBI containing both Swiss-Prot and TrEMBL entries.

289

## 290 **RESULTS**

### 291 ***Salinity tolerance of the three Chlamydomonas species***

292 To identify the salinity sensitivity for all three *Chlamydomonas* species, we conducted a salinity  
293 gradient growth experiment. Based on the native habitat of the Antarctic species (ie. the  
294 hypersaline Lake Bonney) as well as previous literature on salt tolerance in UWO241 (Pocock et  
295 al. 2010) and *C. reinhardtii* (Subramanyam et al. 2010), we selected the following salinity ranges  
296 for growth: (i) ICE-MDV and UWO241 were grown in salinity concentrations of 0.43 mM NaCl  
297 (BBM medium) to 700 mM NaCl (salinity concentration at 17 m Lake Bonney), and (ii) *C.*  
298 *reinhardtii* was grown in 0.43 mM NaCl to 200 mM NaCl (Subramanyam et al. 2010) (Figure 1).  
299 As expected, the halotolerant UWO241 exhibited exponential growth across the full range of  
300 salinity conditions. Despite its native environment of hypersalinity, UWO241 exhibited the

301 shortest lag phase and a doubling time of  $71.94 \pm 2.44$  hrs when grown in low salinity (Figure 1  
302 A, D). Growth under the moderate salinity stress of 250 or 500 mM caused a ~1.6-fold increase  
303 in doubling time ( $113 \pm 24.13$  and  $119 \pm 3$  hrs ( $p < 0.0001$ ), respectively). Last, while the lag  
304 phase was significantly longer in UWO241 cultures grown in 700 mM NaCl, once acclimated,  
305 these cultures exhibited the fastest doubling time ( $55 \pm 3.38$  hr), 1.3-fold faster ( $p < 0.01$ ) relative  
306 to BBM-grown cultures (Figure 1, Table 1).

307 ICE-MDV was more recently isolated from Lake Bonney, where it dominates the  
308 shallow, freshwater depths (Li et al. 2016; Li and Morgan-Kiss 2019). In the salinity gradient  
309 experiment, ICE-MDV grew fastest under control conditions (0.43 mM NaCl, doubling time of  
310  $81.88 \pm 0.71$  hr), but exhibited the ability to grow under a salinity regime of either 250 mM or  
311 500 mM NaCl (doubling times of  $98.90 \pm 10.68$  and  $115.23 \pm 11.22$  hrs, respectively) (Figure 1  
312 B, E). However, unlike UWO241, which has a robust growth at 700 mM NaCl, ICE-MDV was  
313 unable to grow in 700 mM NaCl.

314 The model mesophile *C. reinhardtii* had the highest growth rate under control conditions  
315 (doubling time of  $52.93 \pm 2.91$  hrs), followed by 50 mM NaCl (doubling time of  $67.93 \pm 0.38$   
316 hrs) (Figure 1 C, F). For *C. reinhardtii*, 100 mM NaCl was the maximum salinity that the  
317 cultures exhibited some growth; however, the cultures failed to grow beyond an  $OD_{750}$  of 0.6.  
318 Last, after a few days of slight growth in the upper salinity levels of 150 mM and 200 mM NaCl,  
319 *C. reinhardtii* failed to grow further and entered death phase in both salinity treatments.

320 Based on these growth physiology results, we chose the following salinity levels for  
321 further experiments testing long- and short-term acclimation responses. For low salinity (LS), all  
322 strains were grown in BBM medium (0.43 mM NaCl). For high salinity (HS), we used BBM  
323 supplemented with, (i) 700 mM NaCl for UWO241, (ii) 500 mM NaCl for ICE-MDV and (iii) 50  
324 mM NaCl for *C. reinhardtii* (Table 1). Cultures were acclimated by serial sub-culturing in the  
325 same condition for 14 – 30 days depending upon the growth rate. Photosynthetic and  
326 physiological measurements were conducted for all three strains under the two salinity levels  
327 (Table 1). All three strains maintained a similar capacity of photosynthesis ( $F_v/F_m$ , YPSII) after  
328 acclimation to the two salinity conditions.

329

### 330 *Cyclic electron flow and PSI activity*

331 We monitored PSI activity in ICE-MDV and *C. reinhardtii*. P700 oxidation/reduction kinetics  
332 were conducted on log-phase cultures to monitor changes in P700 photooxidation activity and  
333 PSI-mediated CEF in response to long-term salinity acclimation (Figure 2, Figure S1). LS-  
334 grown cultures of UWO241 exhibited a  $t_{1/2}^{\text{red}}$  of  $259 \pm 45$  ms. In agreement with previous  
335 literature (Kalra et al. 2020; Szyszka-Mroz et al. 2016), acclimation of UWO241 to HS resulted  
336 in a 1.6-fold faster re-reduction rate ( $t_{1/2}^{\text{red}} = 162 \pm 14$  ms) (Figure 2 A). Under LS, ICE-MDV  
337 exhibited a comparable  $t_{1/2}^{\text{red}}$  value as LS-grown UWO241 ( $t_{1/2}^{\text{red}} = 291 \pm 42$  ms) (Figure 2 B).  
338 ICE-MDV responded to HS by a 2.3-fold faster  $t_{1/2}^{\text{red}}$  ( $t_{1/2}^{\text{red}} = 124 \pm 32$  ms). On the other hand, *C.*  
339 *reinhardtii* exhibited a slower  $t_{1/2}^{\text{red}}$  rate in LS media ( $t_{1/2}^{\text{red}} = 495 \pm 43$  ms) which was around 1.6 -  
340 1.9-fold slower than LS-grown ICE-MDV and UWO241 (Figure 2 C). *C. reinhardtii* displayed  
341 1.5 times faster re-reduction rates after acclimation to salinity stress ( $t_{1/2}^{\text{red}} = 311 \pm 10$  ms; Figure  
342 2 C) which matched the salinity response of the psychrophiles. In addition, we also measured  
343 change in P700 absorbance ( $\Delta A_{820}/A_{820}$ ) after AL illumination which reflects the redox state of  
344 P700. Both the psychrophiles, (Figure 2 D, E) displayed lower  $\Delta A_{820}/A_{820}$  values when  
345 compared to *C. reinhardtii* (Figure 2 F) (1.5- and 1.7-fold lower, respectively), indicating a  
346 reduced capacity for PSI oxidation. Interestingly, the  $\Delta A_{820}/A_{820}$  values were further reduced  
347 significantly in the psychrophiles (Figure 2 D, E) after salinity stress acclimation, while *C.*  
348 *reinhardtii* did not show any significant change in  $\Delta A_{820}/A_{820}$  after salinity stress acclimation  
349 (Figure 2 F).

350 We also validated our *C. reinhardtii* P700 CEF data with electrochromic shift (ECS)  
351 kinetics which estimates light-dependent photosynthesis driven transthylakoid proton flux using  
352 IDEA spectrophotometer (Baker et al., 2007) (Figure S3). We used dark interval relaxation  
353 kinetics (DIRK) to observe the shift in the electrochromic signal at 520 nm (Kramer et al., 2003).  
354 The proton motive force (pmf) was estimated from the total ECS signal (ECS<sub>t</sub>) in *C. reinhardtii*  
355 under both low and high salinity conditions (Figure S3 A). We detected higher pmf in HS-  
356 acclimated *C. reinhardtii* in all light intensities and the pmf was significantly higher under light  
357 intensities of  $200 \mu\text{mol photons m}^{-2} \text{s}^{-1}$  and above compared to low salt conditions (~1.6 fold).  
358 This increase in pmf can be attributed to either decrease in ATP synthase activity or proton  
359 efflux, or an increase in proton flux through linear electron flow or cyclic electron flow. To  
360 identify the processes contributing to increased pmf in HS cultures, we measured the



361 transthylakoid proton conductivity ( $g_{H^+}$ ) and flux ( $v_{H^+}$ ) through ATP synthase (Carrillo et al.,  
362 2016; Kanazawa & Kramer, 2002; Livingston et al., 2010) (Figure S3 B, C). Proton conductivity  
363 or permeability ( $g_{H^+}$ ) is estimated from inverse of half-time of rapid decay of the ECS signal  
364 ( $\tau_{ECS}$ ) and is dependent on ATP synthase activity (Baker et al., 2007). Both LS and HS cultures  
365 showed similar conductivity at lower light intensities, however, at 300  $\mu\text{mol photons m}^{-2} \text{s}^{-1}$  and  
366 above, the conductivity in HS cultures decreased ( $\sim 1.18$  folds) compared to LS cultures (Figure  
367 S3 B). On the other hand, the proton flux in HS cultures was consistently higher (1.2 – 2 folds)  
368 compared to LS cultures, indicating higher ATP synthesis in HS condition (Figure S3 C). To  
369 dissect whether LEF or CEF is contributing to increased proton flux in HS cultures, we plotted  
370  $v_{H^+}$  against LEF. The slope of this curve can inform us about the relative contribution of each  
371 pathway towards proton flux (Figure S3 D). We observed that the slope of the HS cultures was  
372 1.25-fold higher than LS cultures, indicating that CEF significantly contributes towards  
373 increased proton flux in *C. reinhardtii* HS cultures, which tightly corroborates with our P700  
374 findings. Similar results were also observed for UWO241 cultures acclimated to high salinity in  
375 our previous study (Kalra et al., 2020), further emphasizing the importance of CEF in HS  
376 acclimation in both non-halophyte and halophyte *Chlamydomonas* species.

377

### 378 ***Effect of long-term high-salinity acclimation on short-term state transition response***

379 Previous research showed that UWO241 is a natural state transition mutant (Morgan-Kiss et al.  
380 2002); however, the capacity for state transitions in the sister species ICE-MDV has not been  
381 tested. We conducted state transition tests on all three *Chlamydomonas* species after low and  
382 high salinity acclimation (Figure 3, Figure S2). In agreement with previous reports, UWO241  
383 cells exhibited very low PSI fluorescence under low salinity, which was further reduced in high  
384 salinity (Figure 3 A). State transition treatment had no effect on UWO241 grown under either  
385 condition (Figure 3 A).

386 While ICE-MDV was isolated from the same Antarctic lake as UWO241, its 77K  
387 fluorescence emission spectra characteristics were markedly different from that of UWO241  
388 (Figure 3 B). First, under low salinity, ICE-MDV exhibited detectable levels of PSI fluorescence.  
389 In addition, when exposed to state 2 conditions, ICE-MDV LS responded with a 1.25-fold  
390 increase in PSI fluorescence, suggesting that unlike UWO241, ICE-MDV has retained the ability  
391 to undergo state transitions (Figure 3 B). Acclimation to HS resulted in a 1.2-fold reduction PSI

392 fluorescence emission in HS- versus LS-conditions. Furthermore, under state transition  
393 conditions, no detectable change in PSI fluorescence was observed in HS-acclimated ICE-MDV  
394 cells (Figure 3 B).

395 As expected, under low salt conditions, *C. reinhardtii* exhibited a typical 77K  
396 fluorescence emission spectrum and the ability to undergo a state transition (Figure 3 C). Growth  
397 under high salinity resulted in a 1.2-fold decrease in PSI fluorescence yield. Last, unlike the  
398 psychrophile strains, *C. reinhardtii*-HS cultures retained the ability to undergo a state transition,  
399 exhibiting a comparable response to state 1 conditions as the LS cultures (Figure 3 C).

400 State transition capacity can also be measured as a loss in maximum fluorescence of PSII  
401 ( $F_M$ ) at room temperature via detachment of LHCII antenna proteins. We used this measurement  
402 to validate the 77K fluorescence emission data as described before (Girolomoni et al., 2017).  
403 This test confirmed the 77K fluorescence emission results that UWO241 lacks the capacity for  
404 state transitions, regardless of growth conditions (Figure 3 D). In contrast, both ICE-MDV-LS  
405 and *C. reinhardtii*-LS cells exhibited 36 and 29 % state transition capacity, which also agreed  
406 with the 77K fluorescence emission results. In addition, both ICE-MDV and *C. reinhardtii*  
407 exhibited a significant reduction in state transition capacity, following acclimation to high salt  
408 (3.5- and 2.2-fold, respectively, relative to LS conditions;  $p < 0.01$ ; Figure 3 E, F).

409

#### 410 ***Effect of salinity on NPQ capacity and its relationship with CEF***

411 To understand the effect of salinity on NPQ, we measured the NPQ capacity of all the three  
412 strains under low and high salinity during a light curve (Figure 4 A). UWO241 displayed  
413 increased capacity for NPQ at high salinity at every light level; however, the difference was not  
414 significant. On the other hand, *C. reinhardtii* and ICE-MDV showed higher NPQ capacity at  
415 high salinity only at the maximum light intensity ( $830 \mu\text{mol photons m}^{-2}$ ). Overall, *C. reinhardtii*  
416 displayed highest NPQ capacity, which was significantly higher than UWO241 and ICE-MDV  
417 under low salt conditions. Among the psychrophiles, UWO241 had significantly higher NPQ  
418 capacity than ICE-MDV under both low and high salinity conditions (Figure xx).

419 Next, we evaluated the relationship between maximum NPQ capacity and CEF for the  
420 three species (Figure 4 B). As expected, increase in NPQ was correlated with higher CEF (i.e.  
421 faster  $t_{1/2}^{\text{red}}$ ) in all three species but the slope of this increase varied with organism. The slope of



422 increase was highest in UWO241 ( $4.5 \times 10^{-3}$  units?) followed by *C. reinhardtii* ( $3.9 \times 10^{-3}$ ) and last  
423 ICE-MDV ( $1.8 \times 10^{-3}$ ).

424

#### 425 ***Thylakoid protein phosphorylation***

426 In *C. reinhardtii*, several key photosynthetic proteins are phosphorylated in response to changes  
427 in environmental conditions. State transitions are accompanied by transient phosphorylation of  
428 LHCII proteins through STT7 kinase (Lemeille & Rochaix, 2010). Previous reports have shown  
429 that the thylakoid proteome of UWO241 is under-phosphorylated relative to other photosynthetic  
430 organisms and exhibits novel high molecular weight phospho-proteins (Morgan-Kiss et al. 2002;  
431 Szyszka et al. 2007). We compared thylakoid phospho-protein profiles of the three strains  
432 acclimated to either LS or HS (Figure 5). When probed with a phospho-threonine antibody,  
433 phosphorylation of major LHCII proteins was not observed in UWO241 grown under either LS  
434 or HS conditions (Figure 5, A). The phosphoprotein profile of thylakoids from UWO241  
435 exhibited phosphorylation of several high molecular weight proteins (~150 and 250 kDa) under  
436 both LS and HS.

437 ICE-MDV exhibited phosphorylation of some major LHCII proteins (type III and IV)  
438 under either LS or HS; however, some phospho-LHCII proteins that were detected in *C.*  
439 *reinhardtii* were not detectable (Figure 5, B). Last, thylakoids isolated from LS- or HS-grown  
440 ICE-MDV also possessed several high molecular weight phospho-proteins (~150 kDa), albeit at  
441 lower levels compared with UWO241. *C. reinhardtii* exhibited phosphorylation of several  
442 thylakoid proteins, specifically phosphorylated LHCII (type I, II, III and IV) (Figure 5, C).  
443 Growth in high salinity did not alter the pattern or abundance of phosphoproteins of *C.*  
444 *reinhardtii*. Last, we did not detect phosphorylation of larger proteins in *C. reinhardtii* under  
445 either growth condition.

446

#### 447 ***Assembly of chlorophyll protein supercomplexes under high salinity***

448 PSI-supercomplexes have been shown to be associated with conditions promoting CEF. In  
449 UWO241, formation of a stable PSI-supercomplex is proposed to be essential for maintaining  
450 sustained high rates of CEF (Szyska-Mroz et al. 2015; Kalra et al. 2020). We conducted sucrose  
451 density gradient centrifugation on solubilized thylakoid membranes from the three  
452 *Chlamydomonas* species after acclimation to salinity stress. As a control, we separated Chl-

453 protein complexes from solubilized thylakoids from *C. reinhardtii* exposed to either state 1 or  
454 state 2. Under State 1, solubilized thylakoids of LS-grown *C. reinhardtii* exhibited three Chl-  
455 protein bands: (i) trimeric LHCII (band 1), (ii) PSII core (band 2) and (iii) PSI-LHCI complex  
456 (band 3) (Figure 6 A). As expected, State 2 treated- thylakoids exhibited a fourth band  
457 representing the PSI-supercomplex (Figure 6 A, band 4).

458 Next, we compared the banding patterns in sucrose density gradients from thylakoids  
459 isolated from all three *Chlamydomonas* species after acclimation to salinity. In response to HS,  
460 all strains exhibited a reduction in the relative levels of PSI (Band 3). In addition, thylakoids  
461 isolated from HS-acclimated cultures of all three *Chlamydomonas* species exhibited the  
462 appearance of the supercomplex band (band 4; Figure 6 B).

463 Bands from the gradients were collected for 77K Chl fluorescence analysis (Figure 6 C-  
464 G). In *C. reinhardtii* exposed to short-term conditions, emission peaks for the major Chl-protein  
465 complexes agreed with previous reports (Iwai et al., 2010). In state 1, Band 1 and 2 exhibited  
466 major fluorescence peaks at 678 nm (LHCII) and 682 nm (PSII core) respectively, while Band 3  
467 exhibited emission peaks at both 678 nm and 712 nm (PSI-LHCI) (Figure 6 C). In state 2, Band  
468 4 exhibited a similar emission spectrum pattern as Band 3, with a reduction in 712 nm emission  
469 (Figure 6 D).

470 The 77K fluorescence emission spectra patterns of the PSI and supercomplex bands  
471 exhibited strain- and growth condition-distinctions (Figure 6 A, B). First, HS acclimation in *C.*  
472 *reinhardtii* resulted in a loss of PSI fluorescence emission at 712 nm in Bands 3 and 4 (Figure 6  
473 E). In contrast, ICE-MDV-HS thylakoids exhibited a broad shoulder in fluorescence emission  
474 between 705 - 712 nm for Bands 3 and 4. In agreement with Kalra et al. (2020), HS-acclimated  
475 UWO241 exhibited minimal PSI fluorescence for Bands 3 and 4 (Figure 6 G).

476

#### 477 ***Proteome analysis of high salinity-associated supercomplexes***

478 Recent reports have shown that the HS-associated supercomplex of UWO241 exhibits some  
479 distinct compositional features compared with supercomplexes isolated from other algae,  
480 including the presence of novel proteins and a depletion in LHCI and LHCII polypeptides (Kalra  
481 et al. 2020). We compared SC composition in *C. reinhardtii* and UWO241 after acclimation to  
482 high salinity (HS) with *C. reinhardtii* under state 2 conditions (SII), using shotgun proteomics  
483 (Figure 7; Table 2). All three supercomplexes had proteins of PSI, LHCI, LHCII and Cyt b<sub>6</sub>f

484 (Table 2). However, relatively higher number of polypeptides belonging to these three thylakoid  
485 complexes were identified in the supercomplexes from *C. reinhardtii* compared to the other two  
486 species. For example, the *C. reinhardtii* supercomplexes contained PSI core subunits while  
487 UWO241-HS supercomplex was missing several, including PsaA and PsaB. However, using  
488 western blotting, we could detect PsaA in the supercomplex band (Band 4, Figure S4) as well as  
489 PSI-LHCI complex (Band 3, Figure S4). Both *C. reinhardtii* supercomplexes contained all  
490 subunits of Cyt  $b_6f$ , whereas only core subunits PetA, PetB, and PetC were detected in UWO241.

491 Notably, the UWO241 supercomplex was depleted for most LHCII and LHCI proteins  
492 compared with both supercomplexes isolated from *C. reinhardtii*. The relative abundance of  
493 several proteins belonging to light harvesting complexes I and II, which have been previously  
494 associated with other supercomplexes, was compared using normalized spectral abundance  
495 factor (NSAF) (Figure 7 A, B). LHCI subunit abundance was variable among the different  
496 supercomplexes. While *C. reinhardtii* -SII supercomplex contained all but one Lhca subunit,  
497 supercomplexes from HS-*C. reinhardtii* and UWO241 only contained 4 and 2 Lhcas, respectively  
498 (Figure 7 B). Both supercomplexes from *C. reinhardtii* contained the 4 major LHCII subunits.  
499 In contrast, the UWO241 supercomplex lacked all LHCIIIs except cp29.

500

## 501 DISCUSSION

502 Much of the research on acclimation of photosynthetic organisms to environmental stress  
503 has intensively focused on a handful of model organisms. There is a significant knowledge gap  
504 in identifying acclimation strategies in photosynthetic organisms adapted to permanent stress in  
505 their native habitats. In this study, we exploited the salinity tolerance variability of three  
506 *Chlamydomonas* spp. to delineate the roles of CEF and PSI-supercomplex formation during  
507 long-term stress. *C. priscuii* UWO241 is a well-studied psychrophilic halophyte and exhibited  
508 robust growth and photosynthetic activity at 700 mM NaCl. Whilst from the same Antarctic lake,  
509 the sister species *C. sp. ICE-MDV* showed lower halotolerance, growing slowly in salinity levels  
510 at or above 500 mM NaCl. We attribute the differential salinity sensitivities between the two  
511 Lake Bonney algae to the permanent halocline in the water column (Priscu & Spigel, 1996).  
512 ICE-MDV dominates the freshwater surface layers, while UWO241 was isolated from the deep  
513 hypersaline layers (Neale and Priscu 1995). Thus, these extremophilic green algal strains provide  
514 an opportunity to compare the consequences of adaptation to differential long-term salinity

515 stress. We included the salt-sensitive model green alga, *Chlamydomonas reinhardtii*, to delineate  
516 between common and novel mechanisms of long-term stress acclimation in salt-sensitive vs. -  
517 tolerant *Chlamydomonas* spp.

518 While CEF is essential in plants and algae for balancing ATP/NADPH (Kramer & Evans,  
519 2011; Lucker & Kramer, 2013) and photoprotection in both PSII (Joliot & Johnson, 2011;  
520 Kukuczka et al., 2014) and PSI (Huang et al., 2013; Huang et al., 2017; Yamori & Shikanai,  
521 2016), it has been generally associated with response to short-term, transient stress (Iwai et al.  
522 2010; Takahashi et al. 2013; Strand et al. 2015). In contrast, UWO241 maintains sustained high  
523 rates of CEF (Szyszka-Mroz et al. 2015; Kalra et al. 2020). We wondered is this phenomenon an  
524 oddity of one extremophilic strain or could high CEF represent a generalized long-term stress  
525 strategy? First, we showed that under nonstress conditions both the Antarctic lake algae,  
526 UWO241 and ICE-MDV, exhibit markedly faster CEF rates relative to *C. reinhardtii*. More  
527 importantly, all three strains responded to long-term salinity stress by increasing CEF; although,  
528 CEF rates in *C. reinhardtii*-HS were still significantly slower relative to the extremophiles.  
529 Sustained CEF has also been recently reported in other extremophilic algae living in high latitude  
530 environments, such as the snow alga *Chlamydomonas nivalis* (Young & Schmidt, 2020; Zheng,  
531 Xue et al., 2020). ECS measurements in *C. reinhardtii* and UWO241 higher CEF in high salt-  
532 acclimated cells, which was associated with increased proton flux through ATP synthase in both  
533 species (Figure S3; Kalra et al., 2020). Increased CEF in all three species was also associated  
534 with higher NPQ capacity (Figure 4). We propose that increased CEF can contribute to excess  
535 ATP production and quenching of excess energy under long-term salinity stress.

536 Salinity acclimation involves strain-specific changes in PSI structure and function. One  
537 of the early discoveries in UWO241 was that it exhibits permanent downregulation of PSI across  
538 a broad range of treatments and growth conditions (Cook et al., 2019; Morgan-Kiss et al.,  
539 2002a,b; Morgan et al., 1998). Morgan et al. (1998) and Kalra et al. (2020) linked the  
540 constitutively reduced PSI low temperature fluorescence emission in UWO241 with loss of most  
541 LHCI polypeptides. A recent report also showed that ICE-MDV and *C. reinhardtii* modulated  
542 PSI fluorescence emission in response to iron availability, while UWO241 exhibited minimal  
543 changes in PSI (Cook et al. 2019). In agreement with Cook et al. (2019), ICE-MDV exhibited  
544 PSI functional characteristics that more closely match *C. reinhardtii* (Figure. 3 A-C). Thus,  
545 under low salinity conditions, PSI structure appears to be distinct between the Lake Bonney

546 algae, UWO241 and ICE-MDV. This would be an advantage for ICE-MDV which resides in the  
547 more variable, less extreme habitat of the shallow layers of Lake Bonney. During high salt  
548 acclimation, all three strains exhibited reduced PSI fluorescence in either whole cells or isolated  
549 PSI complexes (Figures. 3 A-C and 5 E-G). These results suggest a common long-term stress-  
550 induced effect on PSI organization.

551 Sustained CEF is associated with formation of a PSI-supercomplex. A high molecular  
552 weight band that migrated lower than PSI-LHCI bands was detected in the sucrose density  
553 gradients from high salt-acclimated cultures of all three of the *Chlamydomonas* species (Figure 6  
554 B). A PSI-supercomplex was first reported in *C. reinhardtii* when the presence of several LHCII  
555 subunits that migrate from PSII to PSI during state 2 transition (Takahashi et al., 2006). Later  
556 studies identified additional protein participants in the supercomplex. The state 2 supercomplex  
557 was shown to be calcium-regulated, containing CAS, ANR1 and PGRL1 proteins (Terashima et  
558 al. 2012). Further research discovered that cyt  $b_6f$  is also essential for supercomplex formation  
559 (Minagawa, 2016). A recent structural study identified two LHCI (Lhca2 and 9) subunits whose  
560 dissociation is important for PSI-LHCI-cyt  $b_6f$  supercomplex formation (Steinbeck et al., 2018).  
561 In addition, a PSI-LHCI-LHCII supercomplex of *C. reinhardtii* under state 2 has two LHCII  
562 trimers and ten LHCI subunits (Z. Huang et al., 2021). Our first clue that the HS-induced  
563 supercomplexes could be functionally distinct from that of the *C. reinhardtii* State 2  
564 supercomplex came from 77K fluorescence emission spectra of the isolated pigment-protein  
565 complexes. Both PSI and the supercomplex isolated from *C. reinhardtii* cells in State 2 exhibited  
566 fluorescence emission bands at 720 nm, indicative of PSI fluorescence. In contrast, PSI and  
567 supercomplex bands collected from *C. reinhardtii*-HS cells exhibited minimal PSI fluorescence  
568 and resembled the emission spectra of UWO241 (Figure 6 D, E, G), indicating the absence of  
569 LHCI in the supercomplex.

570 PSI-supercomplexes are ubiquitous; however, protein composition is strain-specific and  
571 dependent upon the time scale of stress exposure. Under transient conditions, several proteins  
572 were identified in the *C. reinhardtii* PSI-supercomplexes, including PSI core proteins, cyt  $b_6f$ ,  
573 LHCI, LHCII, CAS (Calcium Sensing protein), FNR1 (Ferredoxin NADP Reductase), ANR1  
574 (Anaerobic response 1 protein) (Iwai et al., 2010; Steinbeck et al., 2018; Takahashi et al., 2006;  
575 Terashima et al., 2012). However, composition of supercomplexes operating under longer term  
576 time scales is not known. To further understand the strain- and treatment-specific differences

577 between the supercomplexes, we analyzed the supercomplex components using mass  
578 spectrometry. In agreement with previous studies (Z. Huang et al., 2021; Iwai et al., 2010;  
579 Steinbeck et al., 2018; Terashima et al., 2012), both the HS and state 2 (SII) *C. reinhardtii*  
580 supercomplexes contained 10 out of 13 PSI subunits. In stark contrast, the UWO241  
581 supercomplex only contained 4 core PSI proteins. The supercomplexes also contained varying  
582 numbers of Lhca proteins. Relative to the SII supercomplex, the HS supercomplex of *C.*  
583 *reinhardtii* was missing three Lhca proteins (Lhca3, Lhca4, Lhca5). In agreement with Kalra et  
584 al. (2020), the UWO241-HS supercomplex lacked all Lhca proteins except Lhca3 and Lhca5.  
585 Thus, reduction in Lhca proteins and a reduced PSI peak in the supercomplex 77K fluorescence  
586 emission spectra appear to be part of salinity acclimation in *C. reinhardtii*. Recently, cyt b<sub>6</sub>f has  
587 been shown to be an important member of the state 2 supercomplex, where electron transfer  
588 activity revealed reduction of cyt b subunit through ferredoxin (Minagawa, 2016). In our study  
589 both HS supercomplexes of UWO241 and *C. reinhardtii* contained several cyt b<sub>6</sub>f subunits;  
590 however, UWO241 supercomplex had disproportionately higher abundance of core Pet A, B and  
591 C subunits, and only trace levels of the other Pet proteins (Table 2).

592        Presence of a salt-associated supercomplex was associated with reduced state transition  
593 capacity. State transitions are short-term acclimatory mechanisms that re-balance excitation  
594 energy under conditions of an over-reduced PETC and are shared across broadly diverse  
595 photosynthetic lifeforms (Wollman, 2001). UWO241 is a state transition mutant which does not  
596 phosphorylate major LHCI (Morgan-Kiss et al., 2002). Even though ICE-MDV has evolved in  
597 the same lake and is also a psychrophile, ICE-MDV exhibited a typical capacity for state  
598 transitions which was comparable with that of *C. reinhardtii* (Figure 3 B). Thus, a loss of state  
599 transitions is not a consequence of psychrophily. Instead, when ICE-MDV and *C. reinhardtii*  
600 were acclimated to high salinity, both strains exhibited significant losses in state transition  
601 capacity (Figure 3 E, F). These results suggest that long-term acclimation to salinity and  
602 formation of a supercomplex attenuates the capacity for state transitions. This phenomenon is  
603 further enhanced during adaptation to a hypersaline environment to the extent that the  
604 mechanism was permanently lost in UWO241. Takizawa et al. (2009) also observed that LS-  
605 grown cells of UWO241 were sensitive to oxidizing or reducing conditions of DCMU (state 1)  
606 and FCCP (state 2), respectively, while HS-grown cultures were remained locked in State 1.  
607 More recently, Szyzaska-Mroz et al. (2019) reported that UWO241 may utilize a poorly



608 understood spill-over mechanism instead of classic state transition; although, the localization of  
609 PSII and PSI in UWO241 thylakoids is unknown and an older report suggested that the two  
610 complexes are not close (Morgan-Kiss et al. 2002).

611         Adaptation to low temperatures and high salinity has led to differential thylakoid  
612 phospho-protein patterns. The aberrant capacity for state transitions in UWO241 was previously  
613 linked with to an inability to phosphorylate LHCII polypeptides based on immunoblotting with  
614 phospho-threonine antibodies (Morgan-Kiss et al. 2002a). Instead, novel, high molecular mass  
615 phosphoproteins of >130 kD as well as a 17 kD polypeptide identified as a PsbP-like protein  
616 were identified in the thylakoids and supercomplexes isolated from HS-grown UWO241 cells  
617 (Szyzka-Mroz et al. 2015). More recently, Szyzka-Mroz et al. (2019) reported that UWO241  
618 does exhibit light-dependent [ $\gamma$ -<sup>33</sup>P] ATP labeling of thylakoid polypeptides, including limited  
619 phosphorylation of LHCII proteins. The phospho-protein patterns were unique in UWO241  
620 compared with *C. reinhardtii*, and phosphorylation required low temperatures (Szyzka-Mroz et  
621 al. 2019). In the current study, we confirmed the unique phosphorylation patterns of UWO241  
622 thylakoids relative to *C. reinhardtii*, with minimal phosphorylation of LHCII and the appearance  
623 of multiple high molecular weight phospho-proteins. In contrast, phospho-protein patterns in ICE-  
624 MDV exhibit features of both UWO241 and *C. reinhardtii*, with the presence of major LHCII  
625 phospho-proteins and the appearance of higher molecular weight bands (Figure 5). These  
626 differences between UWO241 and ICE-MDV fit well with the retainment of state transition  
627 ability in ICE-MDV.

628         What structural or functional alterations in the PETC associated with long-term salinity  
629 acclimation could be contributing to altered state transition response? A major consequence of a  
630 state transitions is formation of PSI-LHCI-LHCII supercomplex and higher CEF (Iwai et al.,  
631 2010). Takahashi et al. (2013) elucidated that although both CEF and state transitions are  
632 controlled through redox status of the plastoquinone pool, they can occur independent of each  
633 other. In UWO241 a restructured photosynthetic apparatus that is primed for constitutive  
634 capacity for CEF is key in high salinity acclimation (Szyzka-Mroz et al. 2015; Kalra et al.,  
635 2020). We surmised that assembly of stable PSI-supercomplexes could be a general acclimatory  
636 response to deal with long-term high salinity. Restructuring of the photosynthetic apparatus to  
637 provide sustained CEF, may inhibit the state transition response.

638 In contrast with our findings that acclimation and adaptation to salinity stress interferes  
639 with state transition capacity in *Chlamydomonas* species, the model halophile *Dunaliella* is  
640 capable of state transitions (Li et al., 2019; Petrou et al., 2008). State transition ability in  
641 *Dunaliella* appears to be associated with different configurations of PSI. Perez-Boerema et al.  
642 isolated a minimal PSI from *D. salina* which is missing several PSI core subunits which are  
643 necessary for state transitions (Perez-Boerema et al., 2020). The structure of the ‘Basic PSI’ had  
644 only 7 core subunits (PsaA-F; PsaJ). Caspy and colleagues then isolated a ‘Large PSI’ containing  
645 additional core subunits, including PsaL and PsaO (Caspy et al., 2020). The authors suggest that  
646 small and large PSI conformations allow green algae to modulate the function of PSI in variable  
647 environments. Our findings extend these recent structural studies by linking PSI-supercomplexes  
648 with PSI function. The salt-tolerant UWO241 supercomplex appears to possess the small  
649 conformation of PSI, while the salt-sensitive *C. reinhardtii* supercomplex appears to contain the  
650 larger PSI.

651 While it is often assumed that global climate change is mainly associated with increasing  
652 temperatures, this is a simplistic view. In fact, the direct and indirect effects of environmental  
653 change on the growth and productivity of photosynthetic organisms residing in different habitats  
654 is complex. As the climate change exacerbates, there is a growing need for an improved  
655 understanding of how organisms will respond to and survive a myriad of stress conditions,  
656 especially long-term steady-state stresses (Alexandratos & Brunismas, 2012). The function of the  
657 photosynthetic apparatus is key to survival under environmental change: CEF is an essential  
658 pathway in almost all photosynthetic organisms, making it an ideal candidate to study stress  
659 acclimation in the context of climate change (Kramer & Evans, 2011). Understanding how CEF  
660 can help plant and algal survival under physiologically relevant, steady-state stress conditions  
661 can help us engineer photosynthetic organisms to better withstand climate change in the future.

662

## 663 CONCLUSIONS

664 We show here that sustained CEF supported by restructuring of PSI and formation of a  
665 supercomplex is an important strategy in green algae to deal with long-term high salinity stress.  
666 CEF has the dual benefit of providing photoprotection of both PSI and PSII and balancing  
667 energy needs. Our study suggests that green algae adapted to different environmental stressors  
668 have evolved to activate CEF and titer the stability of the PSI-supercomplex to support stress



669 responses over broad time scales. Under short-term stress, state transitions and reversible  
670 phosphorylation of LHCIIIs mediate formation of the transient PSI-LHCI-LHCII supercomplex.  
671 During longer time scales when organisms need to fully acclimate, formation of a stable PSI-  
672 supercomplex to support sustained levels of high CEF is essential. Under the long-term stress  
673 conditions, state transition capacity is transiently lost until the stress event dissipates. Last, in  
674 extremophiles which exhibit adaptation under permanent abiotic stress, evolution of constitutive  
675 CEF and additional changes to the supercomplex to further enhance stability helps maintain  
676 robust growth and photosynthesis, but at the expense of full loss of state transitions. Further  
677 research is needed to better understand the stability and functional differences between the green  
678 algal PSI conformations.

679

680 **SUPPLEMENTARY DATA**

681 The following supplementary data are available:

682

683 **Supplementary Figure S1: P700 reduction kinetics of the three *Chlamydomonas* species**  
684 **under low and high salinity.** A. UWO241, B. ICE-MDV, C. *C. reinhardtii*. Low salinity (LS)  
685 traces are shown in blue. High salinity (HS) traces are shown in red.

686

687 **Supplementary Figure S2: PSII state transition test for the three *Chlamydomonas* spp**  
688 **under low (LS) and high (HS) salinity.** The maximum PSII fluorescence values ( $F_{MAX}$ ) are  
689 shown for all three strains (UWO241-A, ICE-MDV-B and *C. reinhardtii*-C) under state I and  
690 state II conditions. State I: DCMU, State II: FCCP. ( $n=4-6$ , dotted line=mean value)

691

692 **Supplementary Figure S3: Electrochromic shift (ECS) measurements for *C. reinhardtii* after**  
693 **low and high salinity acclimation.** A. Total proton motive force (pmf) is shown as total change  
694 in the ECS signal ( $ECS_t$ ) for low (LS) and high (HS) salt acclimated cultures under increasing  
695 light intensities. B. ATP synthase conductivity ( $g_H^+$ ) C. Total proton flux ( $v_H^+$ ) and D. Change in  
696 total proton flux as a function of linear electron flow (LEF). ( $n=3$ ,  $\pm$  SD, \* ( $p < 0.05$ ), \*\*  
697 ( $p < 0.01$ ), \*\*\* ( $p < 0.005$ ), \*\*\*\* ( $p < 0.001$ ))

698

699 **Supplementary Figure S4: Immunoblot of PsaA in UWO241-HS.** Whole thylakoids and  
700 protein complex fractions collected from sucrose density gradient centrifugation (Bands 1, 3 and  
701 4) were run on SDS PAGE and probed using psaA antibody. Molecular wt ladder is shown on  
702 left.

703

704 **ACKNOWLEDGEMENTS**

705 We thank members of Kramer laboratory for their valuable suggestions and inputs on IDEA  
706 spectrophotometer optimization. We also acknowledge Will McHargue for his help with IDEA  
707 spec measurements and bioinformatic processing of fluorescence data. Last, we would like to  
708 thank Microbiology Department at Miami University for the instrument support for Mass  
709 spectrometry.

710

711 **AUTHOR CONTRIBUTIONS**

712 I.K. and R.M.K. conceptualized the study design. I.K. conducted the photobiology, physiology,  
713 spectroscopic and proteomics experiments. R.M.K. supervised the entire study. R.Z provided  
714 IDEAspec support and supervised the measurements. X.W. ran and analyzed the proteomics  
715 data. I.K and R.M.K wrote the original article. I.K, R.M.K, R.Z and X.W edited the final article.

716

717 **CONFLICTS OF INTEREST**

718 The authors declare no conflict of interests.

719

720 **FUNDING**

721 Funding was provided by DOE Grants DE-SC0019138 (RMK, IK, XW) and DE-SC0019464  
722 (RZ).

723

## REFERENCES

- Alexandratos, N., & Brunismas, J. (2012). *WORLD AGRICULTURE TOWARDS 2030/2050. JESA Working Papers 12-03*. <https://doi.org/10.22004/ag.econ.288998>
- Alric, J. (2010). Cyclic electron flow around photosystem I in unicellular green algae. *Photosynthesis Research*, *106*(1–2), 47–56. <https://doi.org/10.1007/s11120-010-9566-4>
- Alric, J., Lavergne, J., & Rappaport, F. (2010). Redox and ATP control of photosynthetic cyclic electron flow in *Chlamydomonas reinhardtii* (I) aerobic conditions. *Biochimica et Biophysica Acta - Bioenergetics*, *1797*(1), 44–51. <https://doi.org/10.1016/j.bbabi.2009.07.009>
- Baker, N. R. (2008). Chlorophyll fluorescence: A probe of photosynthesis in vivo. *Annual Review of Plant Biology*, *59*, 89–113. <https://doi.org/10.1146/annurev.arplant.59.032607.092759>
- Baker, N. R., Harbinson, J., & Kramer, D. M. (2007). Determining the limitations and regulation of photosynthetic energy transduction in leaves. *Plant, Cell and Environment*, *30*(9), 1107–1125. <https://doi.org/10.1111/j.1365-3040.2007.01680.x>
- Carrillo, L. R., Froehlich, J. E., Cruz, J. A., Savage, L. J., & Kramer, D. M. (2016). Multi-level regulation of the chloroplast ATP synthase: the chloroplast NADPH thioredoxin reductase C (NTRC) is required for redox modulation specifically under low irradiance. *The Plant Journal : For Cell and Molecular Biology*, *87*(6), 654–663. <https://doi.org/10.1111/tpj.13226>
- Carvalho, P. C., Lima, D. B., Leprevost, F. V., Santos, M. D. M., Fischer, J. S. G., Aquino, P. F., ... Barbosa, V. C. (2016). Integrated analysis of shotgun proteomic data with PatternLab for proteomics 4.0. *Nature Protocols*, *11*(1), 102–117. <https://doi.org/10.1038/nprot.2015.133>
- Caspy, I., Malavath, T., Klaiman, D., Fadeeva, M., Shkolnisky, Y., & Nelson, N. (2020). Structure and energy transfer pathways of the *Dunaliella Salina* photosystem I supercomplex. *Biochimica et Biophysica Acta - Bioenergetics*, *1861*(10), 148253. <https://doi.org/10.1016/j.bbabi.2020.148253>
- Cook, G., Teufel, A., Kalra, I., Li, W., Wang, X., Priscu, J., & Morgan-Kiss, R. (2019). The Antarctic psychrophiles *Chlamydomonas* spp. UWO241 and ICE-MDV exhibit differential restructuring of photosystem I in response to iron. *Photosynthesis Research*, *141*(2), 209–

228. <https://doi.org/10.1007/s11120-019-00621-0>
- Cowan, A. K., Rose, P. D., & Horne, L. G. (1992). *Dunaliella salina*: A model system for studying the response of plant cells to stress. *Journal of Experimental Botany*, *43*(12), 1535–1547. <https://doi.org/10.1093/jxb/43.12.1535>
- DalCorso, G., Pesaresi, P., Masiero, S., Aseeva, E., Schünemann, D., Finazzi, G., ... Leister, D. (2008). A Complex Containing PGRL1 and PGR5 Is Involved in the Switch between Linear and Cyclic Electron Flow in Arabidopsis. *Cell*, *132*(2), 273–285. <https://doi.org/10.1016/j.cell.2007.12.028>
- Dolhi, J. M., Maxwell, D. P., & Morgan-Kiss, R. M. (2013). Review: The Antarctic *Chlamydomonas raudensis*: An emerging model for cold adaptation of photosynthesis. *Extremophiles*, *17*(5), 711–722. <https://doi.org/10.1007/s00792-013-0571-3>
- Girolomoni, L., Ferrante, P., Berteotti, S., Giuliano, G., Bassi, R., & Ballottari, M. (2017). The function of LHCBM4/6/8 antenna proteins in *Chlamydomonas reinhardtii*. *Journal of Experimental Botany*, *68*(3), 627–641. <https://doi.org/10.1093/jxb/erw462>
- Goyal, A. (2007). Osmoregulation in *Dunaliella*, Part I: Effects of osmotic stress on photosynthesis, dark respiration and glycerol metabolism in *Dunaliella tertiolecta* and its salt-sensitive mutant (HL 25/8). *Plant Physiology and Biochemistry*, *45*(9), 696–704. <https://doi.org/10.1016/j.plaphy.2007.05.008>
- Greenway, H., & Munns, R. (1980). Mechanisms of Salt Tolerance in Nonhalophytes. *Annual Review of Plant Physiology*, *31*(1), 149–190. <https://doi.org/10.1146/annurev.pp.31.060180.001053>
- Grossman, A. (2021). Moving Toward More Model Algae. *Journal of Phycology*, *57*(1), 51–53. <https://doi.org/10.1111/jpy.13094>
- Hasegawa, P. M., Bressan, R. A., Zhu, J. K., & Bohnert, H. J. (2000). Plant cellular and molecular responses to high salinity. *Annual Review of Plant Biology*, *51*, 463–499. <https://doi.org/10.1146/annurev.arplant.51.1.463>
- He, Y., Fu, J., Yu, C., Wang, X., Jiang, Q., Hong, J., ... Jiang, D. (2015). Increasing cyclic electron flow is related to Na<sup>+</sup> sequestration into vacuoles for salt tolerance in soybean. *Journal of Experimental Botany*, *66*(21), 6877–6889. <https://doi.org/10.1093/jxb/erv392>
- Heifetz, P. B., Förster, B., Osmond, C. B., Giles, L. J., & Boynton, J. E. (2000). Effects of

- acetate on facultative autotrophy in *Chlamydomonas reinhardtii* assessed by photosynthetic measurements and stable isotope analyses. *Plant Physiology*, 122(4), 1439–1445.  
<https://doi.org/10.1104/pp.122.4.1439>
- Huang, W., Fu, P. L., Jiang, Y. J., Zhang, J. L., Zhang, S. B., Hu, H., & Cao, K. F. (2013). Differences in the responses of photosystem I and photosystem II of three tree species *Cleistanthus sumatranus*, *Celtis philippensis* and *Pistacia weinmannifolia* exposed to a prolonged drought in a tropical limestone forest. *Tree Physiology*, 33(2), 211–220.  
<https://doi.org/10.1093/treephys/tps132>
- Huang, W., Zhang, S. B., Xu, J. C., & Liu, T. (2017). Plasticity in roles of cyclic electron flow around photosystem I at contrasting temperatures in the chilling-sensitive plant *Calotropis gigantea*. *Environmental and Experimental Botany*, 141(May), 145–153.  
<https://doi.org/10.1016/j.envexpbot.2017.07.011>
- Huang, Z., Liangliang, S., Wenda, W., Zhiyuan, M., Xiaohan, Y., Tingyun, K., ... Guangye, H. (2021). Structure of photosystem I-LHCI-LHCII from the green alga *Chlamydomonas reinhardtii* in State 2. *Nature Communications*, (12(1)), 1–14.  
<https://doi.org/10.1038/s41467-021-21362-6>
- Hüner, N. P. A., Bode, R., Dahal, K., Hollis, L., Rosso, D., Krol, M., & Ivanov, A. G. (2012). Chloroplast redox imbalance governs phenotypic plasticity: The “grand design of photosynthesis” revisited. *Frontiers in Plant Science*, 3(NOV), 1–12.  
<https://doi.org/10.3389/fpls.2012.00255>
- Ivanov, A. G., Morgan, R. M., Gray, G. R., Velitchkova, M. Y., & Huner, N. P. A. (1998). Temperature/light dependent development of selective resistance to photoinhibition of photosystem I. *FEBS Letters*, 430(3), 288–292. [https://doi.org/10.1016/S0014-5793\(98\)00681-4](https://doi.org/10.1016/S0014-5793(98)00681-4)
- Iwai, M., Takizawa, K., Tokutsu, R., Okamuro, A., Takahashi, Y., & Minagawa, J. (2010). Isolation of the elusive supercomplex that drives cyclic electron flow in photosynthesis. *Nature*, 464(7292), 1210–1213. <https://doi.org/10.1038/nature08885>
- Joliot, P., & Johnson, G. N. (2011). Regulation of cyclic and linear electron flow in higher Plants. *Proceedings of the National Academy of Sciences of the United States of America*, 108(32), 13317–13322. <https://doi.org/10.1073/pnas.1110189108>

- Kalra, I., Wang, X., Cvetkovska, M., Jeong, J., McHargue, W., Zhang, R., ... Morgan-Kissa, R. (2020). *Chlamydomonas* sp. UWO 241 exhibits high cyclic electron flow and rewired metabolism under high salinity. *Plant Physiology*, *183*(2), 588–601.  
<https://doi.org/10.1104/pp.19.01280>
- Kanazawa, A., & Kramer, D. M. (2002). In vivo modulation of nonphotochemical exciton quenching (NPQ) by regulation of the chloroplast ATP synthase. *Proceedings of the National Academy of Sciences of the United States of America*, *99*(20), 12789–12794.  
<https://doi.org/10.1073/pnas.182427499>
- Kono, M., & Terashima, I. (2014). Long-term and short-term responses of the photosynthetic electron transport to fluctuating light. *Journal of Photochemistry and Photobiology B: Biology*, *137*, 89–99. <https://doi.org/10.1016/j.jphotobiol.2014.02.016>
- Kramer, D. M., Cruz, J. A., & Kanazawa, A. (2003). Balancing the central roles of the thylakoid proton gradient. *Trends in Plant Science*, *8*(1), 27–32. [https://doi.org/10.1016/S1360-1385\(02\)00010-9](https://doi.org/10.1016/S1360-1385(02)00010-9)
- Kramer, D. M., & Evans, J. R. (2011). The importance of energy balance in improving photosynthetic productivity. *Plant Physiology*, *155*(1), 70–78.  
<https://doi.org/10.1104/pp.110.166652>
- Kukuczka, B., Magneschi, L., Petroustos, D., Steinbeck, J., Bald, T., Powikrowska, M., ... Hippler, M. (2014). Proton gradient regulation5-like1-mediated cyclic electron flow is crucial for acclimation to anoxia and complementary to nonphotochemical quenching in stress adaptation. *Plant Physiology*, *165*(4), 1604–1617.  
<https://doi.org/10.1104/pp.114.240648>
- Kumar, V., Wani, S. H., Penna, S., & Tran, L. S. P. (2018). *Salinity Responses and Tolerance in Plants, Volume 1: Targeting Sensory, Transport and Signaling Mechanisms. Salinity Responses and Tolerance in Plants, Volume 1: Targeting Sensory, Transport and Signaling Mechanisms.* <https://doi.org/10.1007/978-3-319-75671-4>
- Laemmli, U. K. (1970). Cleavage of Structural Proteins during the Assembly of the Head of Bacteriophage T4. *Nature*, *227*, 680–685.
- Lemeille, S., & Rochaix, J. D. (2010). State transitions at the crossroad of thylakoid signalling pathways. *Photosynthesis Research*, *106*(1–2), 33–46. <https://doi.org/10.1007/s11120-010->

9538-8

- Li, W., & Morgan-Kiss, R. M. (2019). Influence of environmental drivers and potential interactions on the distribution of microbial communities from three permanently stratified Antarctic lakes. *Frontiers in Microbiology*, *10*(MAY), 1–16.  
<https://doi.org/10.3389/fmicb.2019.01067>
- Li, W., Podar, M., & Morgan-Kiss, R. M. (2016). Ultrastructural and single-cell-level characterization reveals metabolic versatility in a microbial eukaryote community from an ice-covered Antarctic lake. *Applied and Environmental Microbiology*, *82*(12), 3659–3670.  
<https://doi.org/10.1128/AEM.00478-16>
- Li, Y., Gu, W., Huang, A., Xie, X., Wu, S., & Wang, G. (2019). Transcriptome analysis reveals regulation of gene expression during photoacclimation to high irradiance levels in *Dunaliella salina* (Chlorophyceae). *Phycological Research*, *67*(4), 291–302.  
<https://doi.org/10.1111/pre.12379>
- Livingston, A. K., Cruz, J. A., Kohzuma, K., Dhingra, A., & Kramer, D. M. (2010). An arabidopsis mutant with high cyclic electron flow around photosystem i (hcef) involving the nadphdehydrogenase complex. *Plant Cell*, *22*(1), 221–233.  
<https://doi.org/10.1105/tpc.109.071084>
- Lucker, B., & Kramer, D. M. (2013). Regulation of cyclic electron flow in *Chlamydomonas reinhardtii* under fluctuating carbon availability. *Photosynthesis Research*, *117*(1–3), 449–459. <https://doi.org/10.1007/s11120-013-9932-0>
- Minagawa, J. (2016). A Supercomplex of Cytochrome bf and Photosystem I for Cyclic Electron Flow, 453–462. [https://doi.org/10.1007/978-94-017-7481-9\\_23](https://doi.org/10.1007/978-94-017-7481-9_23)
- Morgan-Kiss, R., Ivanov, A. G., Williams, J., Khan, M., & Huner, N. P. A. (2002). Differential thermal effects on the energy distribution between photosystem II and photosystem I in thylakoid membranes of a psychrophilic and a mesophilic alga. *Biochimica et Biophysica Acta - Biomembranes*, *1561*(2), 251–265. [https://doi.org/10.1016/S0005-2736\(02\)00352-8](https://doi.org/10.1016/S0005-2736(02)00352-8)
- Morgan-Kiss, R. M., Ivanov, A. G., & Huner, N. P. A. (2002). The Antarctic psychrophile, *Chlamydomonas subcaudata*, is deficient in State I-State II transitions. *Planta*, *214*(3), 435–445. <https://doi.org/10.1007/s004250100635>
- Morgan-Kiss, R. M., Ivanov, A. G., Modla, S., Czymbek, K., Hüner, N. P. A., Priscu, J. C., ...



- Hanson, T. E. (2008). Identity and physiology of a new psychrophilic eukaryotic green alga, *Chlorella* sp., strain BI, isolated from a transitory pond near Bratina Island, Antarctica. *Extremophiles*, *12*(5), 701–711. <https://doi.org/10.1007/s00792-008-0176-4>
- Morgan, R. M., Ivanov, A. G., Priscu, J. C., Maxwell, D. P., & Huner, N. P. A. (1998). Structure and composition of the photochemical apparatus of the Antarctic green alga, *Chlamydomonas subcaudata*. *Photosynthesis Research*, *56*(3), 303–314. <https://doi.org/10.1023/A:1006048519302>
- Morton, M. J. L., Awlia, M., Al-Tamimi, N., Saade, S., Pailles, Y., Negrão, S., & Tester, M. (2019). Salt stress under the scalpel – dissecting the genetics of salt tolerance. *Plant Journal*, *97*(1), 148–163. <https://doi.org/10.1111/tpj.14189>
- Neelam, S., & Subramanyam, R. (2013). Alteration of photochemistry and protein degradation of photosystem II from *Chlamydomonas reinhardtii* under high salt grown cells. *Journal of Photochemistry and Photobiology B: Biology*, *124*, 63–70. <https://doi.org/10.1016/j.jphotobiol.2013.04.007>
- Oren, A. (2014). The ecology of *Dunaliella* in high-salt environments. *Journal of Biological Research (Greece)*, *21*(1), 1–8. <https://doi.org/10.1186/s40709-014-0023-y>
- Perez-Boerema, A., Klaiman, D., Caspy, I., Netzer-El, S. Y., Amunts, A., & Nelson, N. (2020). Structure of a minimal photosystem I from the green alga *Dunaliella salina*. *Nature Plants*, *6*(3), 321–327. <https://doi.org/10.1038/s41477-020-0611-9>
- Perrineau, M. M., Zelzion, E., Gross, J., Price, D. C., Boyd, J., & Bhattacharya, D. (2014). Evolution of salt tolerance in a laboratory reared population of *Chlamydomonas reinhardtii*. *Environmental Microbiology*, *16*(6), 1755–1766. <https://doi.org/10.1111/1462-2920.12372>
- Petrou, K., Doblin, M. A., Smith, R. A., Ralph, P. J., Shelly, K., & Beardall, J. (2008). State transitions and nonphotochemical quenching during a nutrient-induced fluorescence transient in phosphorus-starved *Dunaliella tertiolecta*. *Journal of Phycology*, *44*(5), 1204–1211. <https://doi.org/10.1111/j.1529-8817.2008.00585.x>
- Priscu, J. C., & Spigel, R. H. (1996). Evolution of temperature and salt structure of Lake Bonney, a chemically stratified Antarctic lake. *Hydrobiologia*, *321*(3), 177–190.
- Sacksteder, C. A., & Kramer, D. M. (2000). Dark-interval relaxation kinetics (DIRK) of absorbance changes as a quantitative probe of steady-state electron transfer. *Photosynthesis*

- Research*, 66(1–2), 145–158. <https://doi.org/10.1023/A:1010785912271>
- Sithtisarn, S., Yokthongwattana, K., Mahong, B., Roytrakul, S., Paemane, A., Phaonakrop, N., & Yokthongwattana, C. (2017). Comparative proteomic analysis of *Chlamydomonas reinhardtii* control and a salinity-tolerant strain revealed a differential protein expression pattern. *Planta*, 246(5), 843–856. <https://doi.org/10.1007/s00425-017-2734-4>
- Stahl-Rommel, S., Kalra, I., D’Silva, S., Hahn, M. M., Popson, D., Cvetkovska, M., & Morgan-Kiss, R. M. (2021). Cyclic electron flow (CEF) and ascorbate pathway activity provide constitutive photoprotection for the photopsychrophile, *Chlamydomonas* sp. UWO 241 (renamed *Chlamydomonas priscuii*). *Photosynthesis Research*, (0123456789). <https://doi.org/10.1007/s11120-021-00877-5>
- Steinbeck, J., Ross, I. L., Rothnagel, R., Gäbelein, P., Schulze, S., Giles, N., ... Hankamer, B. (2018). Structure of a PSI-LHCI-cyt b6f supercomplex in *Chlamydomonas reinhardtii* promoting cyclic electron flow under anaerobic conditions. *Proceedings of the National Academy of Sciences of the United States of America*, 115(41), 10517–10522. <https://doi.org/10.1073/pnas.1809973115>
- Sudhir, P., & Murthy, S. D. S. (2004). Effects of salt stress on basic processes of photosynthesis. *Photosynthetica*, 42(4), 481–486. <https://doi.org/10.1007/S11099-005-0001-6>
- Suorsa, M. (2015). Cyclic electron flow provides acclimatory plasticity for the photosynthetic machinery under various environmental conditions and developmental stages. *Frontiers in Plant Science*, 6(September), 1–8. <https://doi.org/10.3389/fpls.2015.00800>
- Szyska-Mroz, B., Pittock, P., Ivanov, A. G., Lajoie, G., & Hüner, N. P. A. (2015). The antarctic psychrophile *Chlamydomonas* sp. UWO 241 preferentially phosphorylates a photosystem I-cytochrome b6/f supercomplex. *Plant Physiology*, 169(1), 717–736. <https://doi.org/10.1104/pp.15.00625>
- Szyska, B., Ivanov, A. G., & Hüner, N. P. A. (2007). Psychrophily is associated with differential energy partitioning, photosystem stoichiometry and polypeptide phosphorylation in *Chlamydomonas raudensis*. *Biochimica et Biophysica Acta - Bioenergetics*, 1767(6), 789–800. <https://doi.org/10.1016/j.bbabi.2006.12.001>
- Takahashi, H., Clowez, S., Wollman, F. A., Vallon, O., & Rappaport, F. (2013). Cyclic electron flow is redox-controlled but independent of state transition. *Nature Communications*, 4.

<https://doi.org/10.1038/ncomms2954>

- Takahashi, H., Iwai, M., Takahashi, Y., & Minagawa, J. (2006). Identification of the mobile light-harvesting complex II polypeptides for state transitions in *Chlamydomonas reinhardtii*. *Proceedings of the National Academy of Sciences of the United States of America*, *103*(2), 477–482. <https://doi.org/10.1073/pnas.0509952103>
- Takahashi, H., Schmollinger, S., Lee, J. H., Schroda, M., Rappaport, F., Wollman, F. A., & Vallon, O. (2016). PETO Interacts with Other Effectors of Cyclic Electron Flow in *Chlamydomonas*. *Molecular Plant*, *9*(4), 558–568. <https://doi.org/10.1016/j.molp.2015.12.017>
- Terashima, M., Petroutsos, D., Hüdig, M., Tolstygina, I., Trompelt, K., Gäbelein, P., ... Hippler, M. (2012). Calcium-dependent regulation of cyclic photosynthetic electron transfer by a CAS, ANR1, and PGRL1 complex. *Proceedings of the National Academy of Sciences of the United States of America*, *109*(43), 17717–17722. <https://doi.org/10.1073/pnas.1207118109>
- Wang, N., Qian, Z., Luo, M., Fan, S., Zhang, X., & Zhang, L. (2018). Identification of salt stress responding genes using transcriptome analysis in green alga *chlamydomonas reinhardtii*. *International Journal of Molecular Sciences*, *19*(11). <https://doi.org/10.3390/ijms19113359>
- Wang, X., Liu, W., Xin, C., Zheng, Y., Cheng, Y., Sun, S., ... Yuan, J. S. (2016). Enhanced limonene production in cyanobacteria reveals photosynthesis limitations. *Proceedings of the National Academy of Sciences of the United States of America*, *113*(50), 14225–14230. <https://doi.org/10.1073/pnas.1613340113>
- Welle, P. D., & Mauter, M. S. (2017). High-resolution model for estimating the economic and policy implications of agricultural soil salinization in California. *Environmental Research Letters*, *12*(9). <https://doi.org/10.1088/1748-9326/aa848e>
- Wollman, F. A. (2001). State transitions reveal the dynamics and flexibility of the photosynthetic apparatus. *EMBO Journal*, *20*(14), 3623–3630. <https://doi.org/10.1093/emboj/20.14.3623>
- Yamori, W., & Shikanai, T. (2016). Physiological Functions of Cyclic Electron Transport Around Photosystem i in Sustaining Photosynthesis and Plant Growth. *Annual Review of Plant Biology*, *67*(July), 81–106. <https://doi.org/10.1146/annurev-arplant-043015-112002>
- Young, J. N., & Schmidt, K. (2020). It's what's inside that matters: physiological adaptations of high-latitude marine microalgae to environmental change. *New Phytologist*, *227*(5), 1307–

1318. <https://doi.org/10.1111/nph.16648>

Zhang, R., Cruz, J. A., Kramer, D. M., Magallanes-Lundback, M. E., Dellapenna, D., & Sharkey, T. D. (2009). Moderate heat stress reduces the pH component of the transthylakoid proton motive force in light-adapted, intact tobacco leaves. *Plant, Cell and Environment*, 32(11), 1538–1547. <https://doi.org/10.1111/j.1365-3040.2009.02018.x>

Zheng, Y., Xue, C., Chen, H., He, C., & Wang, Q. (2020). Low-Temperature Adaptation of the Snow Alga *Chlamydomonas nivalis* Is Associated With the Photosynthetic System Regulatory Process. *Frontiers in Microbiology*, 11(June), 1–15. <https://doi.org/10.3389/fmicb.2020.01233>

**TABLES:**

**TABLE 1. Physiological characterization of low salt (LS) and high salt (HS) acclimated**

*Chlamydomonas* species. Doubling time, photosynthetic parameters and extracted chlorophyll content are shown for all three species (UWO241, ICE-MDV and *C. reinhardtii*) under the two salinity conditions, low salt (LS) and high salt (HS) (n=3 ± SD). F<sub>v</sub>/F<sub>M</sub>: maximal photosynthetic capacity, YPSII: PSII yield, NPQ: non-photochemical quenching, qP: photochemical efficiency

|                       | Doubling time (hr) |                  | F <sub>v</sub> /F <sub>M</sub> |                 | YPSII           |                 | qP              |                 | NPQ             |                 | Chlorophyll (µg/ml) |                  |
|-----------------------|--------------------|------------------|--------------------------------|-----------------|-----------------|-----------------|-----------------|-----------------|-----------------|-----------------|---------------------|------------------|
|                       | LS                 | HS               | LS                             | HS              | LS              | HS              | LS              | HS              | LS              | HS              | LS                  | HS               |
| <b>UWO241</b>         | 71.94<br>±2.44     | 55.46<br>± 3.38  | 0.640<br>±0.008                | 0.585<br>±0.007 | 0.463<br>±0.001 | 0.524<br>±0.029 | 0.719<br>±0.089 | 0.766<br>±0.088 | 0.256<br>±0.026 | 0.307<br>±0.043 | 383.53<br>±18.31    | 221.16<br>±12.69 |
| <b>ICE-MDV</b>        | 81.88<br>±0.71     | 115.23<br>±11.22 | 0.694<br>±0.009                | 0.669<br>±0.004 | 0.536<br>±0.019 | 0.518<br>±0.007 | 0.733<br>±0.026 | 0.798<br>±0.025 | 0.171<br>±0.017 | 0.223<br>±0.007 | 398.17<br>± 7.43    | 314.50<br>±12.88 |
| <b>C. reinhardtii</b> | 52.93<br>±2.91     | 70.99<br>± 3.26  | 0.720<br>±0.011                | 0.697<br>±0.019 | 0.621<br>±0.006 | 0.555<br>±0.068 | 0.909<br>±0.060 | 0.829<br>±0.056 | 0.184<br>±0.028 | 0.230<br>±0.037 | 438.26<br>±43.91    | 392.61<br>±54.51 |

**TABLE 2. Major proteins involved in supercomplex formation in *C. reinhardtii* and UWO241.** The subunits of each protein identified through shot-gun proteomics are shown. HS: High salinity acclimated; State 2: State 2 locked culture; PSI: photosystem I; LHCI: Light harvesting complex I; LHCII: Light harvesting complex II, Cyt b<sub>6</sub>f: cytochrome b<sub>6</sub>f, FNR: Ferredoxin NADP reductase, FtsH: ATP dependent zinc metalloprotease, OEEP: Oxygen evolving enhancer protein, CAS: Calcium sensing protein

| Protein complex          | UWO241-HS                    | <i>C. reinhardtii</i> -HS                                  | <i>C. reinhardtii</i> -State 2                             |
|--------------------------|------------------------------|------------------------------------------------------------|------------------------------------------------------------|
| PSI                      | PsaD, PsaF, PsaE, PsaK, PsaH | PsaA, PsaB, PsaC, PsaD, PsaE, PsaF, PsaG, PsaK, PsaL, PsaN | PsaA, PsaB, PsaC, PsaD, PsaE, PsaF, PsaG, PsaK, PsaL, PsaN |
| LHCI                     | Lhca3, Lhca5                 | Lhca1, Lhca2, Lhca7, Lhca9                                 | Lhca1, Lhca2, Lhca3, Lhca4, Lhca5, Lhca7, Lhca9            |
| LHCII                    | Cp29                         | Lhcbm1, Lhcbm3, Lhcbm5, CP26, CP29, Lhcsr3                 | Lhcbm3, Lhcbm5, CP26, CP29                                 |
| Cyt b <sub>6</sub> f     | Pet A, PetB, PetC            | PetA, PetB, PetC, PetD, PetM, PetO                         | PetA, PetB, PetC, PetD, PetM, PetO                         |
| FNR                      | *                            | FNR1                                                       | FNR1                                                       |
| FtsH                     | FtsH2, FtsH 5                | FtsH1, 2                                                   | FtsH1, 2, 4                                                |
| OEEP                     | PsbP, PsbQ                   | PsbQ, PsbP1                                                | PsbQ, PsbO, PsbP1                                          |
| Calcium sensing receptor | CAS                          | CAS                                                        | *                                                          |

## FIGURE LEGENDS

**Figure 1: Growth under salinity gradient for the three *Chlamydomonas* species to identify maximum salinity tolerance.** Top Panel - Growth curves, Bottom Panel – Doubling time (A, D UWO241. B, E ICE-MDV. C, F *C. reinhardtii*). Growth was measured as optical density at 750 nm. BBM = 0.46 mM NaCl. (n=3,  $\pm$ SD).

**Figure 2: P700 oxidation/reduction analysis on the three *Chlamydomonas* spp. under low and high salinity.** Top panel: Re-reduction rate ( $t_{1/2}^{\text{red}}$ ) was calculated under low (black) and high salinity (grey) for all three strains: UWO241 (A), ICE-MDV (B), *C. reinhardtii* (C). Bottom panel: The proportion of photo-oxidizable P700 is shown as change in absorbance at 820 nm ( $\Delta A_{820}/A_{820}$ ) for all three strains under low and high salinity: UWO241 (D), ICE-MDV (E), *C. reinhardtii* (F). Actinic red light was used with DCMU to inhibit electron flow from PSII. (n=9,  $\pm$  SD, ns (not significant,  $p > 0.05$ ), \*\* ( $p < 0.01$ ), \*\*\* ( $p < 0.005$ ), \*\*\*\* ( $p < 0.001$ ))

**Figure 3: State transition tests after acclimation to low and high salinity in *Chlamydomonas* species.** Top panel: Low temperature (77K) fluorescence spectra of the three *Chlamydomonas* spp. under state I and state II conditions after low and high salinity acclimation. Fluorescence values are shown as relative fluorescence units (R.F.U) for each strain: UWO241 (A); ICE-MDV (B); *C. reinhardtii* (C). Low salinity - Black, High salinity - Red. State I – Closed line, State II – dotted line. Bottom panel: Maximal capacity for switching LHCII antenna during State transition induction calculated using room temperature PSII maximum fluorescence ( $F_M$ ) as described before (Girolomoni et al., 2017) for each strain: UWO241 (D); ICE-MDV (E); *C. reinhardtii* (F). ST1: state 1, ST2: state 2. (n=4-6;  $\pm$ SD; ns (not significant,  $p > 0.05$ ), \*\* ( $p < 0.01$ ), \*\*\* ( $p < 0.005$ ))

**Figure 4: Effect of salinity on non-photochemical quenching (NPQ) capacity and relationship with cyclic electron flow (CEF).** (A) NPQ capacity ( $Y(\text{NPQ})$ ) was measured for the three species during a light curve under low (LS, black) and high salinity (HS, grey) conditions in the three strains *C. reinhardtii* (*C. rein*, square), UWO241 (triangle) and ICE-MDV (circles). Statistically significant differences between UWO241 vs ICE-MDV (a) and *C. reinhardtii* vs ICE-MDV (c) are shown (Welch's t-test,  $p < 0.05$ ).

(B) Relationship between maximum NPQ capacity ( $Y(NPQ)_{max}$ ) and CEF (re-reduction time,  $t_{1/2}^{red}$ ) is shown for the two salinity conditions for all species.

**Figure 5: Thylakoid phosphorylation pattern of the three *Chlamydomonas* spp. under low (LS) and high (HS) salinity.** Isolated thylakoids from three species were run on separate 12% SDS-PAGE and probed with phospho-threonine antibody. Panel A: UWO241, Panel B: ICE-MDV, Panel C: *C. reinhardtii*. Mol. wt ladder (KDa) is shown on the left. The different LHCII types are labelled on the right.

**Figure 6: Isolation of supercomplexes from conditions promoting CEF in *Chlamydomonas* species.** Top panel: Separation of protein complexes on a sucrose density gradient for A. model mesophile *C. reinhardtii* during state transitions and B. model mesophile and the psychrophiles ICE-MDV and UWO241 under high salinity. Bottom panel: 77K fluorescence spectra for protein complex bands isolated from sucrose density gradient: *C. reinhardtii* under low salt and state 1 (C), state 2 (D), under high salinity (E); ICE-MDV under high salinity (F); UWO241 under high salinity (G). LS-SI: Low salinity, state 1; LS-SII: Low salinity, state 2; HS: High salinity. Band 1: LHCII, Band 2: PSII, Band 3: PSI-LHCI, Band 4: Supercomplex.

**Figure 7: Proteome comparison of light harvesting complexes of supercomplex fractions from *C. reinhardtii* and UWO241.** Protein composition of *C. reinhardtii* supercomplexes isolated under state 2 and after high salinity acclimation, as well as UWO241 supercomplex after high salinity acclimation are shown. The normalized spectral abundance factor (NSAF) for each identified protein within a supercomplex were calculated to compare the relative abundance of subunits across species and treatments. The major light harvesting complexes and their subunits participating in supercomplex formation are shown here: Light Harvesting complex I (LHCI, A), Light Harvesting complex II (LHCII, B). UWO241-HS (UWO241-HS, Black), *C. reinhardtii*-HS (C.r-HS, White), *C. reinhardtii* state 2 (C.r-SII, Grey).



## FIGURES:

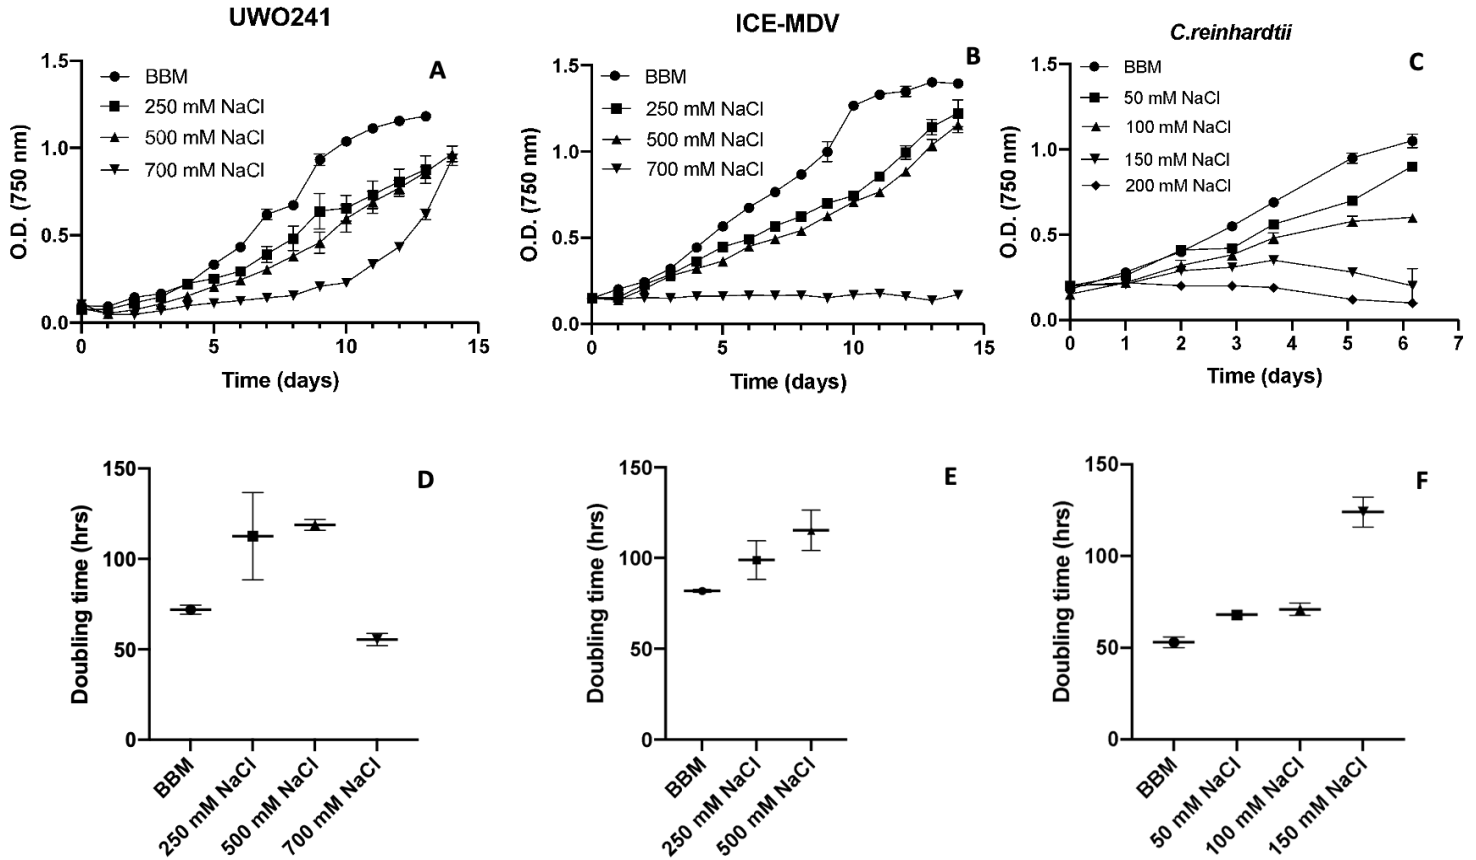

**Figure 1: Growth under salinity gradient for the three *Chlamydomonas* species to identify maximum salinity tolerance.** Top Panel - Growth curves, Bottom Panel – Doubling time (A, D UWO241. B, E ICE-MDV. C, F *C. reinhardtii*). Growth was measured as optical density at 750 nm. BBM = 0.46 mM NaCl. ( $n=3, \pm SD$ ).

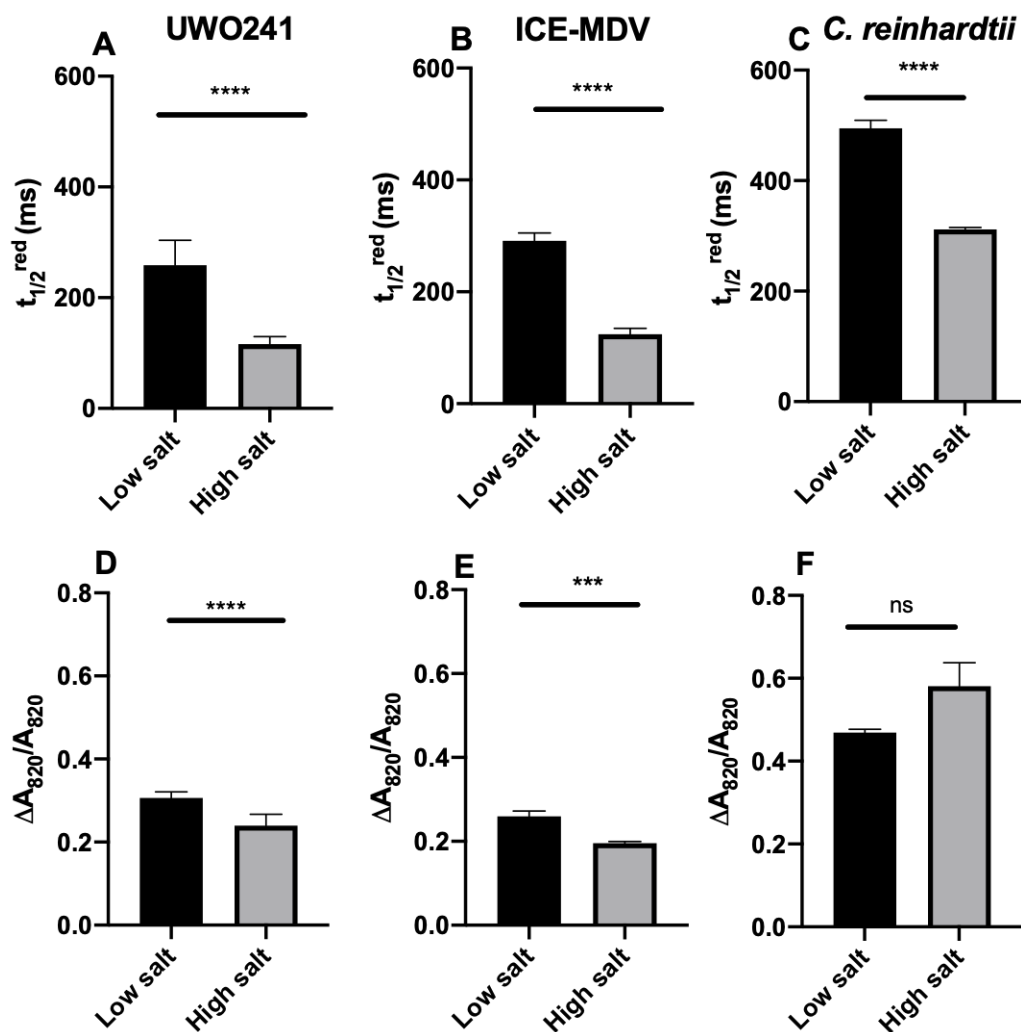

**Figure 2: P700 oxidation/reduction analysis on the three *Chlamydomonas* spp. under low and high salinity.** Top panel: Re-reduction rate ( $t_{1/2}^{\text{red}}$ ) was calculated under low (black) and high salinity (grey) for all three strains: UWO241 (A), ICE-MDV (B), *C. reinhardtii* (C). Bottom panel: The proportion of photo-oxidizable P700 is shown as change in absorbance at 820 nm ( $\Delta A_{820}/A_{820}$ ) for all three strains under low and high salinity: UWO241 (D), ICE-MDV (E), *C. reinhardtii* (F). Actinic red light was used with DCMU to inhibit electron flow from PSII. ( $n=9$ ,  $\pm$  SD, ns (not significant,  $p > 0.05$ ), \*\* ( $p < 0.01$ ), \*\*\* ( $p < 0.005$ ), \*\*\*\* ( $p < 0.001$ ))

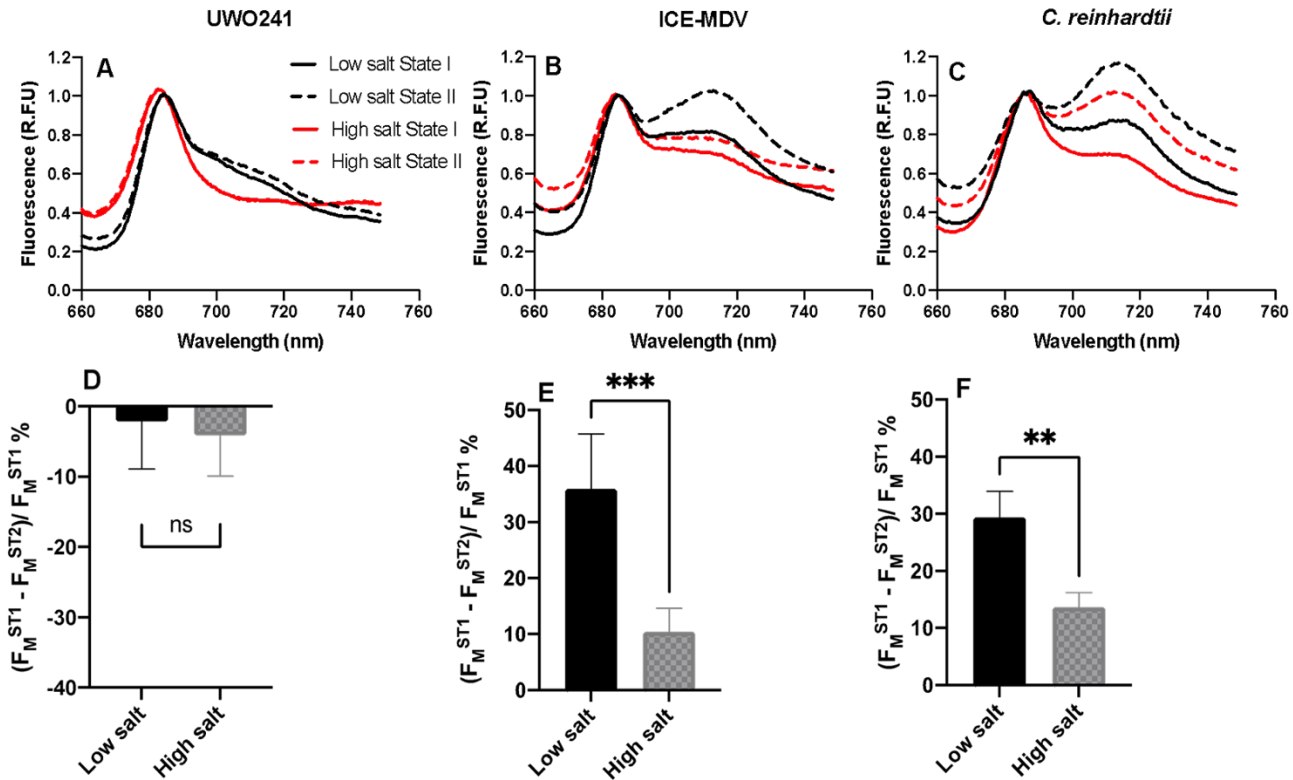

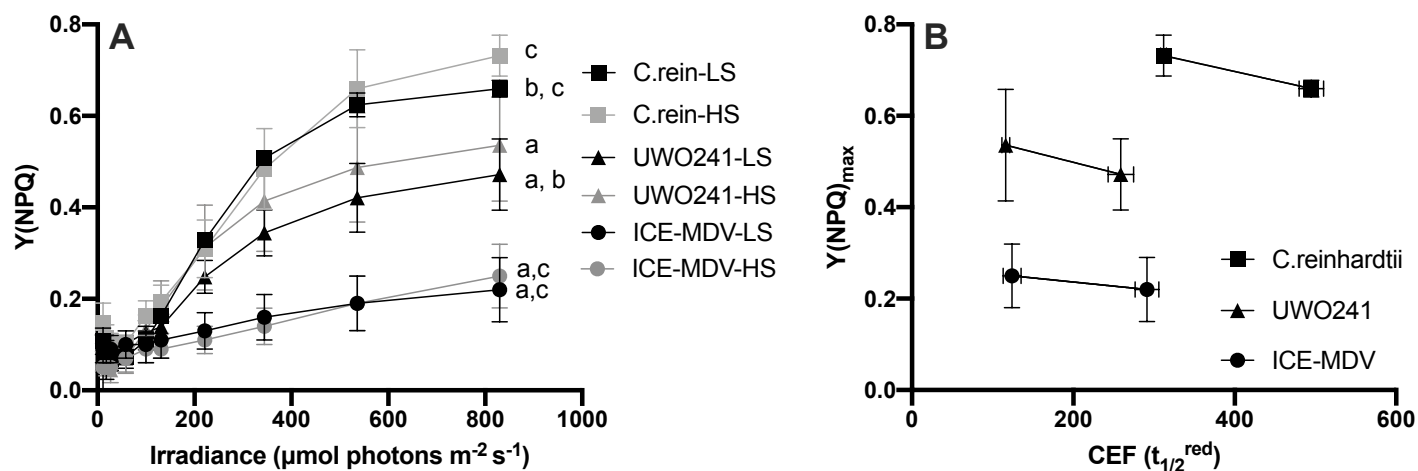

**Figure 4: Effect of salinity on non-photochemical quenching (NPQ) capacity and relationship with cyclic electron flow (CEF).** (A) NPQ capacity ( $Y(\text{NPQ})$ ) was measured for the three species during a light curve under low (LS, black) and high salinity (HS, grey) conditions in the three strains *C. reinhardtii* (C.rein, square), UWO241 (triangle) and ICE-MDV (circles). Statistically significant differences between UWO241 vs ICE-MDV (a) and *C. reinhardtii* (b) as well as *C. reinhardtii* vs ICE-MDV (c) are shown (Welch's t-test,  $p < 0.05$ ). (B) Relationship between maximum NPQ capacity ( $Y(\text{NPQ})_{\text{max}}$ ) and CEF (re-reduction time,  $t_{1/2}^{\text{red}}$ ) is shown for the two salinity conditions for all species.

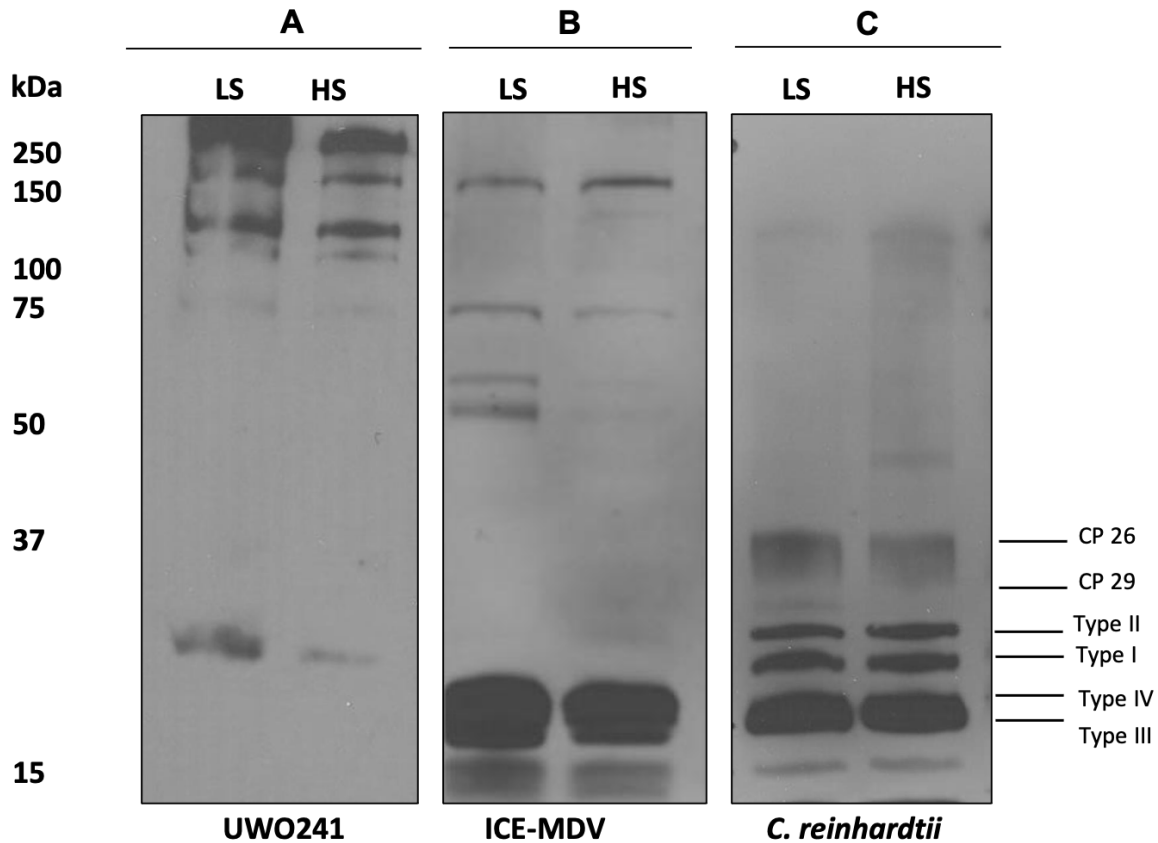

**Figure 5: Thylakoid phosphorylation pattern of the three *Chlamydomonas* spp. under low (LS) and high (HS) salinity.** Isolated thylakoids from three species were run on separate 12% SDS-PAGE and probed with phospho-threonine antibody. Panel A: UWO241, Panel B: ICE-MDV, Panel C: *C. reinhardtii*. Mol. wt ladder (KDa) is shown on the left. The different LHCII types are labelled on the right.

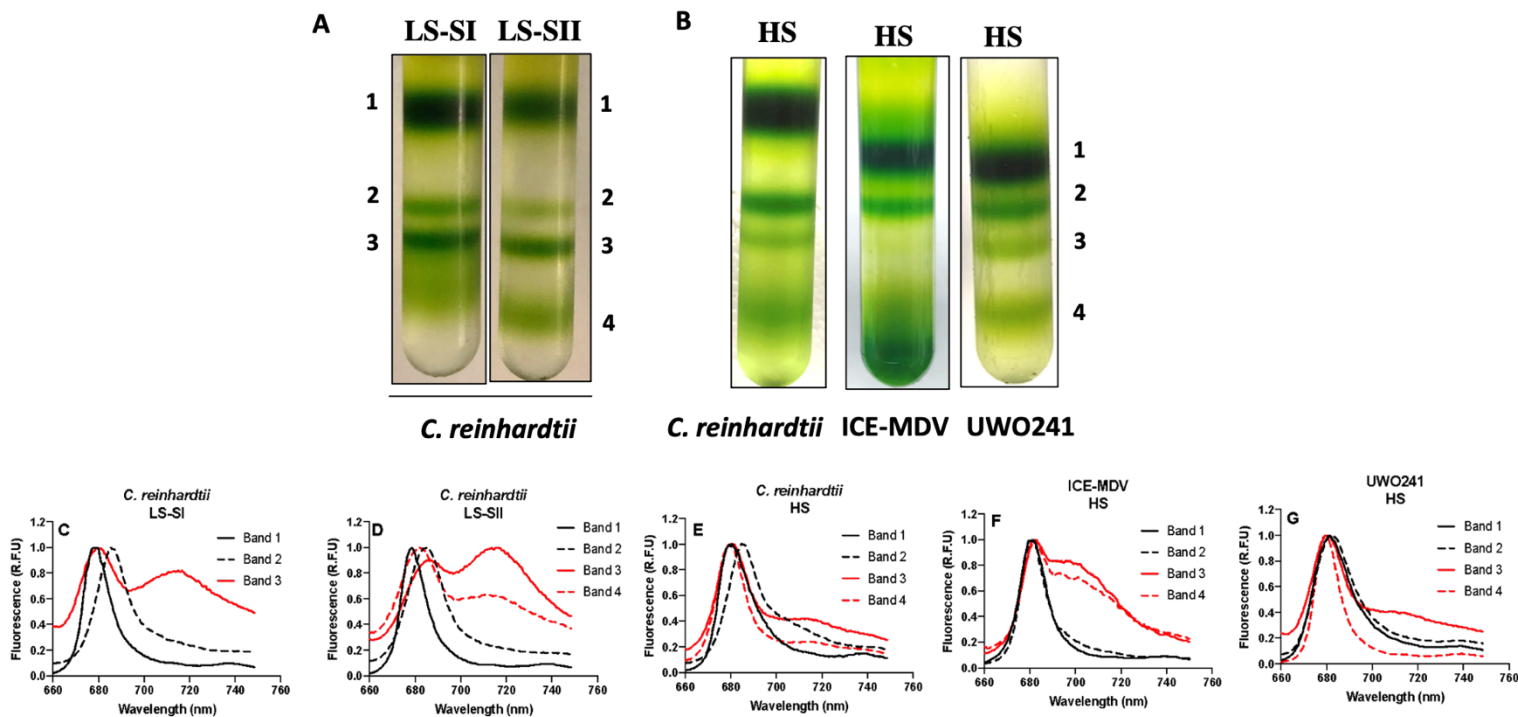

**Figure 6: Isolation of supercomplexes from conditions promoting CEF in *Chlamydomonas* species.** Top panel: Separation of protein complexes on a sucrose density gradient for A. model mesophile *C. reinhardtii* during state transitions and B. model mesophile and the psychrophiles ICE-MDV and UWO241 under high salinity. Bottom panel: 77K fluorescence spectra for protein complex bands isolated from sucrose density gradient: *C. reinhardtii* under low salt and state 1 (C), state 2 (D), under high salinity (E); ICE-MDV under high salinity (F); UWO241 under high salinity (G). LS-SI: Low salinity, state 1; LS-SII: Low salinity, state 2; HS: High salinity. Band 1: LHCII, Band 2: PSII, Band 3: PSI-LHCI, Band 4: Supercomplex.

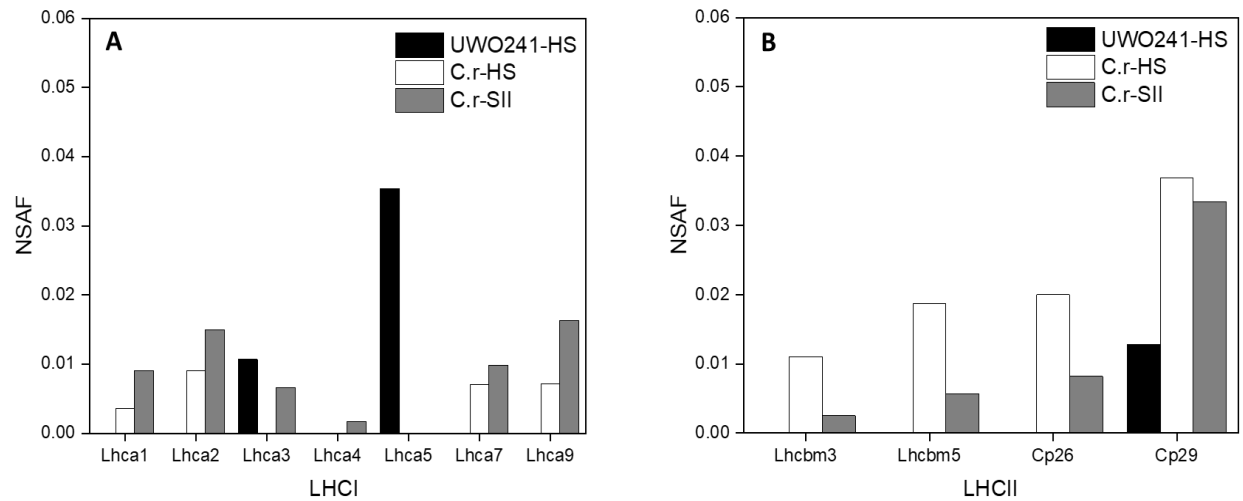

**Figure 7: Proteome comparison of light harvesting complexes of supercomplex fractions from *C. reinhardtii* and UWO241.** Protein composition of *C. reinhardtii* supercomplexes isolated under state 2 and after high salinity acclimation, as well as UWO241 supercomplex after high salinity acclimation are shown. The normalized spectral abundance factor (NSAF) for each identified protein within a supercomplex were calculated to compare the relative abundance of subunits across species and treatments. The major light harvesting complexes and their subunits participating in supercomplex formation are shown here: Light Harvesting complex I (LHCI, A), Light Harvesting complex II (LHCII, B). UWO241-HS (UWO241-HS, Black), *C. reinhardtii*-HS (C.r-HS, White), *C. reinhardtii* state 2 (C.r-SII, Grey).
